# Supplementary material for: Multiplexed Target Enrichment Enables Efficient and In-Depth Analysis of Antimicrobial Resistome in Metagenomes
Source: PubMed Central journal article supplement (PMC9769626; doi:10.1128/spectrum.02297-22), 2022-10-26
Supplement: spectrum.02297-22-s0001.pdf [file spectrum.02297-22-s0001.pdf]

# SUPPLEMENTARY MATERIALS

## Supplementary Figure S1

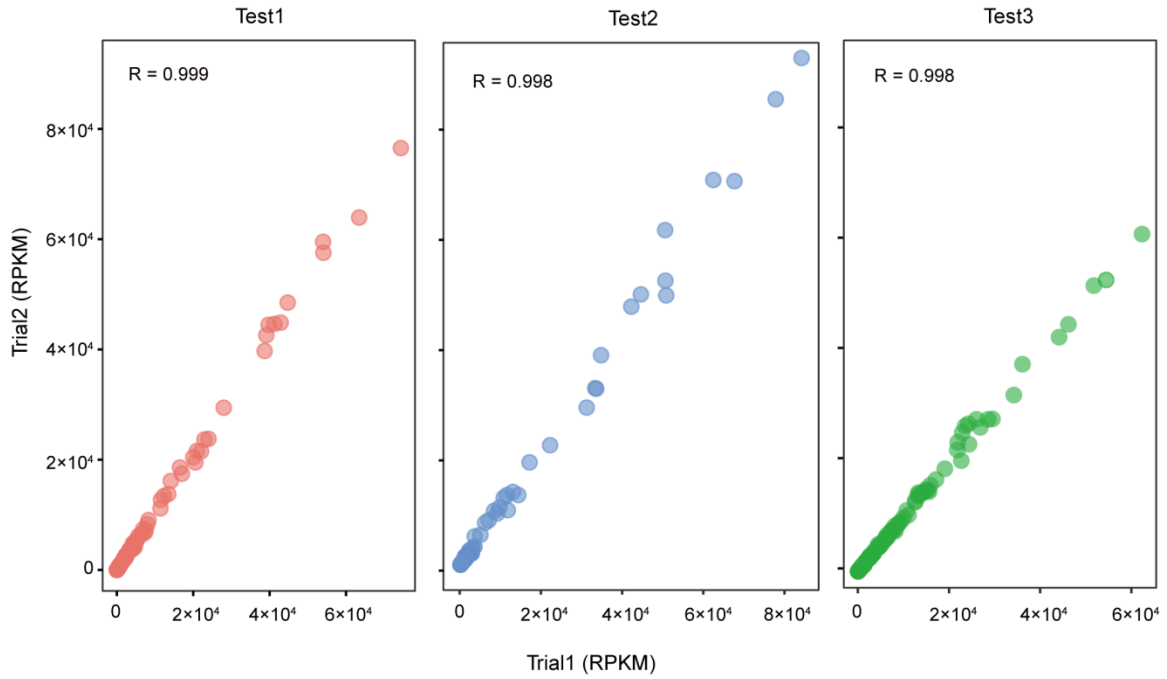

**Figure S1. Consistency of amplicon sequencing method in different trials.** Reads from targeted amplicons of three individual test samples in Tial 2 were subsampled to same depth as reads in Trail 1. Pearson correlation coefficients are shown in the diagram.

### Supplementary Figure S2

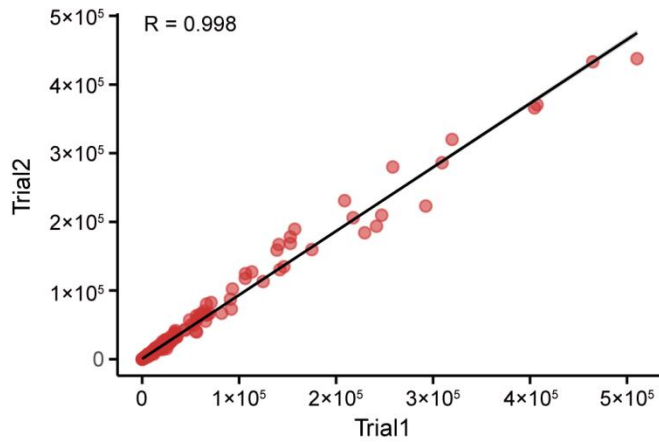

**Figure S2. Consistency of amplicon sequencing method in different trials using upper quartile (UQ) normalization.** Reads from targeted amplicons of three individual test samples in Trial 2 were subsampled to same depth as reads in Trail 1. Pearson correlation coefficients are shown in the diagram.

**Supplementary Figure S3**

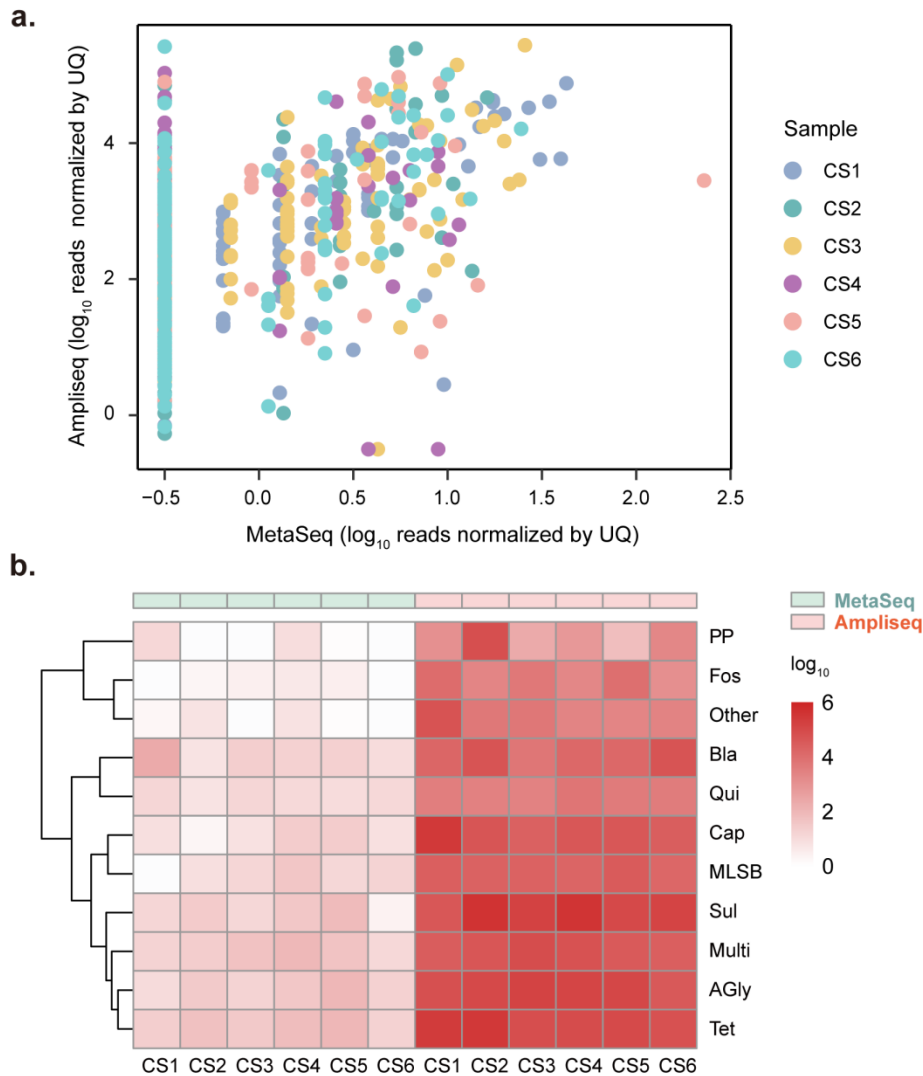

**Figure S3.** (a) Reads (normalized by upper quartile) mapping to the detected genes between MetaSeq and AmpliSeq. Genes only screened by AmpliSeq are showed in initial values of the abscissa axis. (b) Abundance of ARGs in AmpliSeq and MetaSeq. ARGs were classified into ten families (Sul: sulphonamides, AGly: aminoglycosides, Tet: tetracyclines, Bla:  $\beta$ -lactams, Cap: chloramphenicol, MLSB: macrolide-lincosamide-streptogramin B, Multi: multi-drug, PP: polypeptide, Fos: Fosfomycin, Qui: quinolone). Upper quartile (UQ) was used to normalized read counts and log-transformed to produce the heatmap.

## Supplementary Figure S4

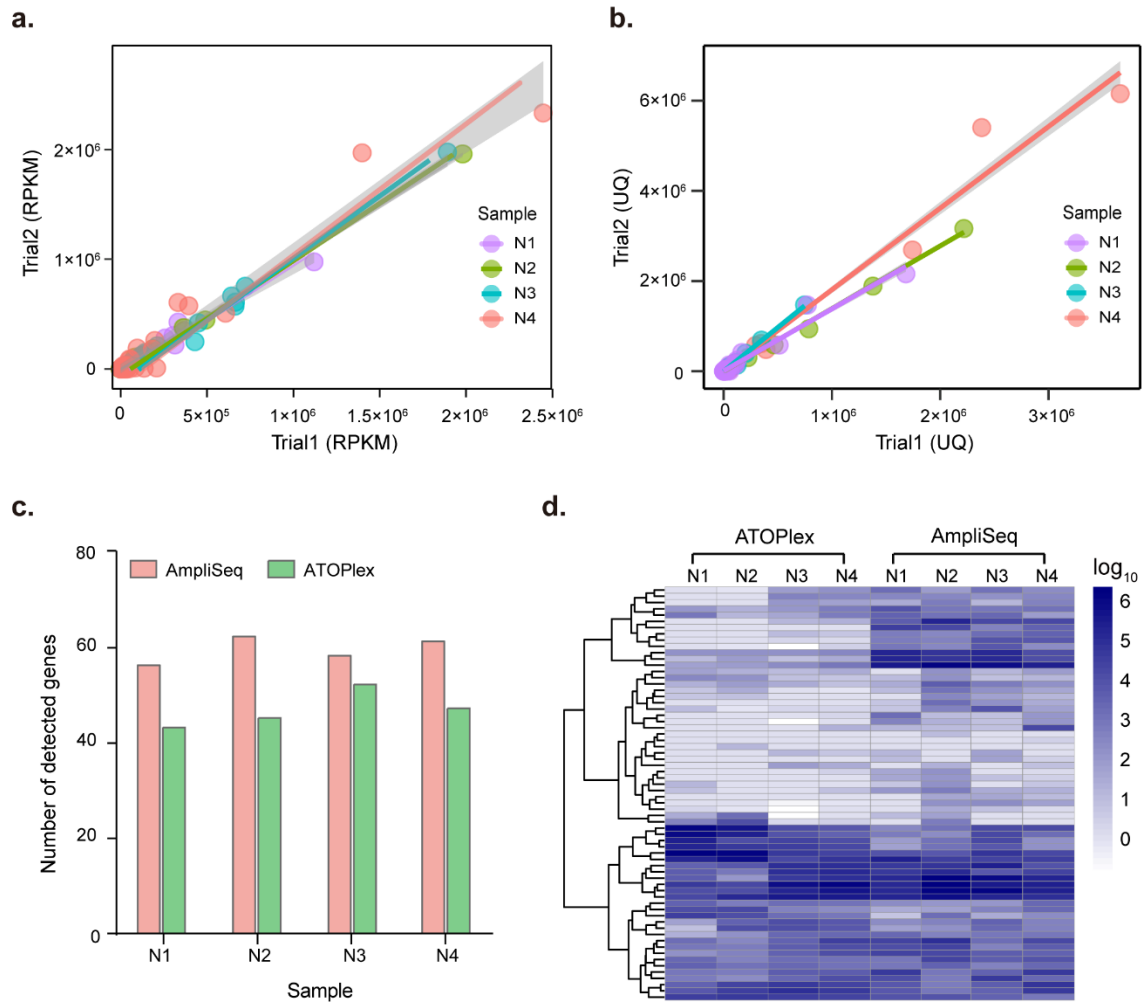

**Figure S4. Application of designed method in ATOplex platform.** (a) Assessment of the consistency of ATOplex method in different trials (normalized by UQ). (b) Assessment of the consistency of ATOplex method in different trials (normalized by RPKM). (c) Comparison of AmpliSeq and ATOplex methods in diversity of target genes. (d) Application of designed approach using AmpliSeq and ATOplex platforms. UQ was used to normalized read counts and log-transformed to produce the heat map.

**Table S1. Details of the 278 target genes included in the custom amplicon sequencing panel.**

| <b>Gene</b> | <b>Classification</b> | <b>AMR Gene Family</b>                                     | <b>Resistance Mechanism</b>  | <b>Accession number</b> |
|-------------|-----------------------|------------------------------------------------------------|------------------------------|-------------------------|
| gyrA        | Quinolone             | fluoroquinolone resistant gyrA                             | antibiotic target alteration | MG995190                |
| qepA        | Quinolone             | fluoroquinolone efflux MFS transporter QepA gene family    | antibiotic efflux            | AB263754                |
| qnrA1       | Quinolone             | quinolone resistance protein (qnr)                         | antibiotic target protection | AY070235                |
| qnrB1       | Quinolone             | quinolone resistance protein (qnr)                         | antibiotic target protection | EF682133                |
| qnrB4       | Quinolone             | quinolone resistance protein (qnr)                         | antibiotic target protection | DQ303921                |
| qnrB8       | Quinolone             | quinolone resistance protein (qnr)                         | antibiotic target protection | EU043312                |
| qnrC        | Quinolone             | quinolone resistance protein (qnr)                         | antibiotic target protection | EU917444                |
| qnrD        | Quinolone             | quinolone resistance protein (qnr)                         | antibiotic target protection | FJ228229                |
| qnrS1       | Quinolone             | quinolone resistance protein (qnr)                         | antibiotic target protection | AB187515                |
| qnrS2       | Quinolone             | quinolone resistance protein (qnr)                         | antibiotic target protection | JF261185                |
| qnrVC1      | Quinolone             | quinolone resistance protein (qnr)                         | antibiotic target protection | EU436855                |
| optrA       | Chloramphenicol       | ATP-binding cassette (ABC) antibiotic efflux pump          | antibiotic efflux            | NG_048023               |
| catA1       | Chloramphenicol       | chloramphenicol acetyltransferase (CAT)                    | antibiotic inactivation      | V00622                  |
| catB3       | Chloramphenicol       | chloramphenicol acetyltransferase (CAT)                    | antibiotic inactivation      | AJ009818                |
| catB8       | Chloramphenicol       | chloramphenicol acetyltransferase (CAT)                    | antibiotic inactivation      | AF227506                |
| cmlA1       | Chloramphenicol       | major facilitator superfamily (MFS) antibiotic efflux pump | antibiotic efflux            | M64556                  |
| fexA        | Chloramphenicol       | major facilitator superfamily (MFS) antibiotic efflux pump | antibiotic efflux            | AJ549214                |
| floR        | Chloramphenicol       | major facilitator superfamily (MFS) antibiotic efflux pump | antibiotic efflux            | AF071555                |
| pexA        | Chloramphenicol       | major facilitator superfamily (MFS) antibiotic efflux pump | antibiotic efflux            | NG_048035               |
| fabK        | Chloramphenicol       | Others                                                     | antibiotic inactivation      | FJ390165                |
| cfr         | Chloramphenicol       | Cfr 23S ribosomal RNA methyltransferase                    | antibiotic target alteration | AM408573                |

|           |                 |                                                            |                              |          |
|-----------|-----------------|------------------------------------------------------------|------------------------------|----------|
| cmx       | Chloramphenicol | major facilitator superfamily (MFS) antibiotic efflux pump | antibiotic efflux            | U85507   |
| aac6-II   | Aminoglycoside  | AAC(6')                                                    | antibiotic inactivation      | L12710   |
| aac6-Ia   | Aminoglycoside  | AAC(6')                                                    | antibiotic inactivation      | M18967   |
| aac6-Ib   | Aminoglycoside  | AAC(6')                                                    | antibiotic inactivation      | JN108884 |
| aac6-Iy   | Aminoglycoside  | AAC(6')                                                    | antibiotic inactivation      | AF144880 |
| aacA_aphD | Aminoglycoside  | APH(2''), AAC(6')                                          | antibiotic inactivation      | GU565967 |
| aacC1     | Aminoglycoside  | AAC(3)                                                     | antibiotic inactivation      | U04610   |
| aacC2     | Aminoglycoside  | AAC(3)                                                     | antibiotic inactivation      | AY138987 |
| aac       | Aminoglycoside  | AAC(6')                                                    | antibiotic inactivation      | AJ628983 |
| aadA1     | Aminoglycoside  | ANT(3'')                                                   | antibiotic inactivation      | KR610434 |
| aadA2     | Aminoglycoside  | ANT(3'')                                                   | antibiotic inactivation      | JQ364967 |
| aadA5     | Aminoglycoside  | ANT(3'')                                                   | antibiotic inactivation      | KT175895 |
| aadA9     | Aminoglycoside  | ANT(3'')                                                   | antibiotic inactivation      | AJ420072 |
| aadA      | Aminoglycoside  | ANT(3'')                                                   | antibiotic inactivation      | MH257908 |
| aadD-1    | Aminoglycoside  | ANT(4')                                                    | antibiotic inactivation      | AF181950 |
| aadE      | Aminoglycoside  | ANT(6)                                                     | antibiotic inactivation      | AB699882 |
| aph2-Id   | Aminoglycoside  | APH(2'')                                                   | antibiotic inactivation      | AF016483 |
| aph6-Ia   | Aminoglycoside  | APH(6)                                                     | antibiotic inactivation      | AY971801 |
| aphA1     | Aminoglycoside  | APH(3')                                                    | antibiotic inactivation      | HM146784 |
| armA      | Aminoglycoside  | 16S rRNA methyltransferase (G1405)                         | antibiotic target alteration | AY220558 |
| rmtA      | Aminoglycoside  | 16S rRNA methyltransferase (G1405)                         | antibiotic target alteration | AB120321 |
| rmtB2     | Aminoglycoside  | 16S rRNA methyltransferase (G1405)                         | antibiotic target alteration | JN968578 |
| rmtC      | Aminoglycoside  | 16S rRNA methyltransferase (G1405)                         | antibiotic target alteration | AB194779 |
| rmtD      | Aminoglycoside  | 16S rRNA methyltransferase (G1405)                         | antibiotic target alteration | DQ914960 |
| rmtE      | Aminoglycoside  | 16S rRNA methyltransferase (G1405)                         | antibiotic target alteration | GU201947 |
| rmtG      | Aminoglycoside  | 16S rRNA methyltransferase (G1405)                         | antibiotic target alteration | KJ004567 |

|            |                |                                               |                              |           |
|------------|----------------|-----------------------------------------------|------------------------------|-----------|
| rmtH       | Aminoglycoside | 16S rRNA methyltransferase (G1405)            | antibiotic target alteration | KC544262  |
| rmtf       | Aminoglycoside | 16S rRNA methyltransferase (G1405)            | antibiotic target alteration | JQ808129  |
| spcN       | Aminoglycoside | spectinomycin phosphotransferase              | antibiotic inactivation      | AF170704  |
| strA       | Aminoglycoside | APH(3")                                       | antibiotic inactivation      | M96392    |
| strB       | Aminoglycoside | Aminoglycoside                                | antibiotic inactivation      | EF493834  |
| str        | Aminoglycoside | Aminoglycoside                                | antibiotic inactivation      | X92946    |
| npmA       | Aminoglycoside | 16S rRNA methyltransferase (A1408)            | antibiotic target alteration | AB261016  |
| bla1       | Beta_Lactamase | class A Bacillus anthracis Bla beta-lactamase | antibiotic inactivation      | AF367983  |
| blaACC-1   | Beta_Lactamase | ACC beta-lactamase, classC                    | antibiotic inactivation      | NG_048588 |
| blaAIM-1   | Beta_Lactamase | AIM beta-lactamase, classB                    | antibiotic inactivation      | AM998375  |
| blaBIC     | Beta_Lactamase | BIC Beta-lactamase, classA                    | antibiotic inactivation      | GQ260093  |
| blaCMY     | Beta_Lactamase | CMY beta-lactamase, classC                    | antibiotic inactivation      | X92508    |
| blaCTX-M-1 | Beta_Lactamase | CTX-M beta-lactamase, classA                  | antibiotic inactivation      | DQ915955  |
| blaCTX-M-9 | Beta_Lactamase | CTX-M beta-lactamase, classA                  | antibiotic inactivation      | HM569735  |
| blaDHA     | Beta_Lactamase | DHA beta-lactamase, classC                    | antibiotic inactivation      | Y16410    |
| blaGES-1   | Beta_Lactamase | GES beta-lactamase, classA                    | antibiotic inactivation      | HQ170511  |
| blaGIM-1   | Beta_Lactamase | GIM beta-lactamase, classB                    | antibiotic inactivation      | JF414726  |
| blaIMP-1   | Beta_Lactamase | IMP beta-lactamase, classA                    | antibiotic inactivation      | DQ522237  |
| blaKPC-1   | Beta_Lactamase | KPC beta-lactamase, classB                    | antibiotic inactivation      | AF297554  |
| blaL1      | Beta_Lactamase | L1 beta-lactamase                             | antibiotic inactivation      | EF126059  |
| blaNDM-5   | Beta_Lactamase | NDM beta-lactamase, classB                    | antibiotic inactivation      | NG_049337 |
| blaOCH     | Beta_Lactamase | OCH beta-lactamase, classC                    | antibiotic inactivation      | LT840075  |
| blaOKP     | Beta_Lactamase | OKP beta-lactamase, classA                    | antibiotic inactivation      | NG_049360 |
| blaOXA-10  | Beta_Lactamase | OXA beta-lactamase, classD                    | antibiotic inactivation      | EU708817  |
| blaOXA-23  | Beta_Lactamase | OXA beta-lactamase, classD                    | antibiotic inactivation      | FJ959346  |
| blaOXA-48  | Beta_Lactamase | OXA beta-lactamase, classD                    | antibiotic inactivation      | AY236073  |

|           |                |                                                     |                              |           |
|-----------|----------------|-----------------------------------------------------|------------------------------|-----------|
| blaOXA-51 | Beta_Lactamase | OXA beta-lactamase, classD                          | antibiotic inactivation      | AJ309734  |
| blaOXA-58 | Beta_Lactamase | OXA beta-lactamase, classD                          | antibiotic inactivation      | AY665723  |
| blaOXY-1  | Beta_Lactamase | OXY beta-lactamase, classA                          | antibiotic inactivation      | Z30177    |
| blaPAO-1  | Beta_Lactamase | PDC beta-lactamase, classC                          | antibiotic inactivation      | AY083595  |
| blaPER-1  | Beta_Lactamase | PER beta-lactamase, classA                          | antibiotic inactivation      | GU944725  |
| blaPER-2  | Beta_Lactamase | PER beta-lactamase, classA                          | antibiotic inactivation      | X93314    |
| blaPSE-1  | Beta_Lactamase | CARB beta-lactamase, classA                         | antibiotic inactivation      | M69058    |
| blaROB-1  | Beta_Lactamase | ROB beta-lactamase, classA                          | antibiotic inactivation      | DQ840517  |
| blaSFO-1  | Beta_Lactamase | FONA beta-lactamase, classA                         | antibiotic inactivation      | AB003148  |
| blaSHV-1  | Beta_Lactamase | SHV beta-lactamase, classA                          | antibiotic inactivation      | AF148850  |
| blaSIM-1  | Beta_Lactamase | SIM beta-lactamase, classB                          | antibiotic inactivation      | JF731030  |
| blaSPM-1  | Beta_Lactamase | SPM beta-lactamase, classB                          | antibiotic inactivation      | AY341249  |
| blaTEM-1A | Beta_Lactamase | TEM beta-lactamase, classA                          | antibiotic inactivation      | HM749966  |
| blaTLA-1  | Beta_Lactamase | TLA beta-lactamase, class A                         | antibiotic inactivation      | AF148067  |
| blaVEB-1  | Beta_Lactamase | VEB beta-lactamase, classA                          | antibiotic inactivation      | HM370393  |
| blaVIM-2  | Beta_Lactamase | VIM beta-lactamase, classB                          | antibiotic inactivation      | KC907378  |
| blaZ-32   | Beta_Lactamase | blaZ beta-lactamase, classA                         | antibiotic inactivation      | AP004832  |
| cepA      | Beta_Lactamase | cepA beta-lactamase                                 | antibiotic inactivation      | L13472    |
| mecA      | Beta_Lactamase | peptidoglycan synthesis                             | antibiotic target protection | NC_000913 |
| carB-1    | Beta_Lactamase | PSE family                                          | antibiotic inactivation      | HQ616211  |
| pbp1a     | Beta_Lactamase | penicillin-binding protein                          | antibiotic target protection | AF446215  |
| pbp2a     | Beta_Lactamase | penicillin-binding protein                          | antibiotic target protection | AF101780  |
| pbp3      | Beta_Lactamase | penicillin-binding protein                          | antibiotic target protection | AJ243120  |
| pbp5      | Beta_Lactamase | penicillin-binding protein                          | antibiotic target protection | AF375986  |
| tet32     | Tetracycline   | tetracycline-resistant ribosomal protection protein | antibiotic target protection | EU722333  |
| tet34     | Tetracycline   | tetracycline-resistant ribosomal protection protein | antibiotic target protection | AB061440  |



|        |              |                                                            |                                                    |              |
|--------|--------------|------------------------------------------------------------|----------------------------------------------------|--------------|
| tet35  | Tetracycline | tetracycline-resistant ribosomal protection protein        | antibiotic target protection                       | AF353562     |
| tet36  | Tetracycline | tetracycline-resistant ribosomal protection protein        | antibiotic target protection                       | AJ514254     |
| tet37  | Tetracycline | tetracycline-resistant ribosomal protection protein        | antibiotic target protection                       | AF540889     |
| tetAP  | Tetracycline | major facilitator superfamily (MFS) antibiotic efflux pump | antibiotic efflux                                  | AB054980     |
| tetA   | Tetracycline | major facilitator superfamily (MFS) antibiotic efflux pump | antibiotic efflux                                  | X00006       |
| tetBP  | Tetracycline | tetracycline-resistant ribosomal protection protein        | antibiotic target protection                       | NC_010937    |
| tetB   | Tetracycline | major facilitator superfamily (MFS) antibiotic efflux pump | antibiotic efflux                                  | AP000342     |
| tetC   | Tetracycline | major facilitator superfamily (MFS) antibiotic efflux pump | antibiotic efflux                                  | NC_003123    |
| tetD   | Tetracycline | major facilitator superfamily (MFS) antibiotic efflux pump | antibiotic efflux                                  | AF467077     |
| tetE   | Tetracycline | major facilitator superfamily (MFS) antibiotic efflux pump | antibiotic efflux                                  | L06940       |
| tetG   | Tetracycline | major facilitator superfamily (MFS) antibiotic efflux pump | antibiotic efflux                                  | S52437       |
| tetH   | Tetracycline | major facilitator superfamily (MFS) antibiotic efflux pump | antibiotic efflux                                  | Y16103       |
| tetJ-1 | Tetracycline | major facilitator superfamily (MFS) antibiotic efflux pump | antibiotic efflux                                  | ACLE01000065 |
| tetK   | Tetracycline | major facilitator superfamily (MFS) antibiotic efflux pump | antibiotic efflux                                  | U38428       |
| tetL   | Tetracycline | major facilitator superfamily (MFS) antibiotic efflux pump | antibiotic efflux                                  | HM235948     |
| tetM   | Tetracycline | tetracycline-resistant ribosomal protection protein        | antibiotic target protection                       | X92947       |
| tetO   | Tetracycline | tetracycline-resistant ribosomal protection protein        | antibiotic target protection                       | M18896       |
| tetQ-3 | Tetracycline | tetracycline-resistant ribosomal protection protein        | antibiotic target protection                       | U73497       |
| tetR   | Tetracycline | major facilitator superfamily (MFS) antibiotic efflux pump | antibiotic target alteration,<br>antibiotic efflux | KF697108     |
| tetS-3 | Tetracycline | tetracycline-resistant ribosomal protection protein        | antibiotic target protection                       | X92946       |
| tetT   | Tetracycline | tetracycline-resistant ribosomal protection protein        | antibiotic target protection                       | L42544       |
| tetU   | Tetracycline | major facilitator superfamily (MFS) antibiotic efflux pump | antibiotic efflux                                  | U01917       |
| tetV   | Tetracycline | major facilitator superfamily (MFS) antibiotic efflux pump | antibiotic efflux                                  | AF030344     |
| tetW   | Tetracycline | tetracycline-resistant ribosomal protection protein        | antibiotic target protection                       | DQ060146     |
| tetX   | Tetracycline | tetracycline inactivation enzyme                           | antibiotic inactivation                            | MT022428     |

|         |              |                                                  |                              |          |
|---------|--------------|--------------------------------------------------|------------------------------|----------|
| tetX3   | Tetracycline | tetracycline inactivation enzyme                 | antibiotic inactivation      | MK134375 |
| tetX4   | Tetracycline | tetracycline inactivation enzyme                 | antibiotic inactivation      | MK134376 |
| vanA    | Polypeptide  | glycopeptide resistance gene cluster, van ligase | antibiotic target alteration | FJ866609 |
| vanB    | Polypeptide  | glycopeptide resistance gene cluster, van ligase | antibiotic target alteration | AF192329 |
| vanC    | Polypeptide  | glycopeptide resistance gene cluster, van ligase | antibiotic target alteration | EU151752 |
| vanG-1  | Polypeptide  | glycopeptide resistance gene cluster, van ligase | antibiotic target alteration | AY271782 |
| vanHB-1 | Polypeptide  | vanH, glycopeptide resistance gene cluster       | antibiotic target alteration | AF192329 |
| vanHD-1 | Polypeptide  | vanH, glycopeptide resistance gene cluster       | antibiotic target alteration | AB242319 |
| vanM    | Polypeptide  | glycopeptide resistance gene cluster, van ligase | antibiotic target alteration | AF288163 |
| vanRA   | Polypeptide  | glycopeptide resistance gene cluster, vanR       | antibiotic target alteration | FJ866609 |
| vanRB   | Polypeptide  | glycopeptide resistance gene cluster, vanR       | antibiotic target alteration | AF192329 |
| vanRC-1 | Polypeptide  | glycopeptide resistance gene cluster, vanR       | antibiotic target alteration | AF162694 |
| vanRD-1 | Polypeptide  | glycopeptide resistance gene cluster, vanR       | antibiotic target alteration | AB242319 |
| vanSB-1 | Polypeptide  | vanS, glycopeptide resistance gene cluster       | antibiotic target alteration | AF192329 |
| vanTC   | Polypeptide  | glycopeptide resistance gene cluster, vanT       | antibiotic target alteration | AF162694 |
| vanTG-1 | Polypeptide  | glycopeptide resistance gene cluster, vanT       | antibiotic target alteration | AY271782 |
| vanWB   | Polypeptide  | vanW, glycopeptide resistance gene cluster       | antibiotic target alteration | AF192329 |
| vanWG   | Polypeptide  | vanW, glycopeptide resistance gene cluster       | antibiotic target alteration | AY271782 |
| vanXA-1 | Polypeptide  | vanX, glycopeptide resistance gene cluster       | antibiotic target alteration | FJ866609 |
| vanXB-1 | Polypeptide  | vanX, glycopeptide resistance gene cluster       | antibiotic target alteration | AF192329 |
| vanXD-1 | Polypeptide  | vanX, glycopeptide resistance gene cluster       | antibiotic target alteration | AB242319 |
| vanYB-1 | Polypeptide  | vanY, glycopeptide resistance gene cluster       | antibiotic target alteration | AF192329 |
| vanYD-1 | Polypeptide  | vanY, glycopeptide resistance gene cluster       | antibiotic target alteration | AB242319 |
| vanRC   | Polypeptide  | glycopeptide resistance gene cluster, vanR       | antibiotic target alteration | EU151753 |
| vanSA   | Polypeptide  | vanS, glycopeptide resistance gene cluster       | antibiotic target alteration | M97297   |
| vanSC   | Polypeptide  | vanS, glycopeptide resistance gene cluster       | antibiotic target alteration | AF162694 |

|          |              |                                                    |                               |           |
|----------|--------------|----------------------------------------------------|-------------------------------|-----------|
| vanSE    | Polypeptide  | vanS, glycopeptide resistance gene cluster         | antibiotic target alteration  | AY700375  |
| vanTE    | Polypeptide  | glycopeptide resistance gene cluster, vanT         | antibiotic target alteration  | FJ872411  |
| mcr-1    | Polypeptide  | MCR phosphoethanolamine transferase                | antibiotic target alteration  | KY853650  |
| mcr-2    | Polypeptide  | MCR phosphoethanolamine transferase                | antibiotic target alteration  | LT598652  |
| mcr-3-17 | Polypeptide  | MCR phosphoethanolamine transferase                | antibiotic target alteration  | MH332767  |
| mcr-3-1  | Polypeptide  | MCR phosphoethanolamine transferase                | antibiotic target alteration  | KY924928  |
| mcr-4    | Polypeptide  | MCR phosphoethanolamine transferase                | antibiotic target alteration  | MF543359  |
| mcr-5    | Polypeptide  | MCR phosphoethanolamine transferase                | antibiotic target alteration  | KY807921  |
| mcr-6    | Polypeptide  | MCR phosphoethanolamine transferase                | antibiotic target alteration  | MF176240  |
| mcr-7    | Polypeptide  | MCR phosphoethanolamine transferase                | antibiotic target alteration  | MG267386  |
| mcr-8    | Polypeptide  | MCR phosphoethanolamine transferase                | antibiotic target alteration  | MG736312  |
| mcr-9    | Polypeptide  | MCR phosphoethanolamine transferase                | antibiotic target alteration  | MK791138  |
| dfrA1    | Sulfonamides | trimethoprim resistant dihydrofolate reductase dfr | antibiotic target replacement | MH574896  |
| dfrA     | Sulfonamides | trimethoprim resistant dihydrofolate reductase dfr | antibiotic target replacement | GU565967  |
| dfrK     | Sulfonamides | trimethoprim resistant dihydrofolate reductase dfr | antibiotic target replacement | FN390947  |
| dfrA12   | Sulfonamides | trimethoprim resistant dihydrofolate reductase dfr | antibiotic target replacement | JN108892  |
| folA     | Sulfonamides | ATP-binding cassette (ABC) antibiotic efflux pump  | antibiotic efflux             | EU871432  |
| sul1     | Sulfonamides | sulfonamide resistant sul                          | antibiotic target replacement | EF667294  |
| sul2     | Sulfonamides | sulfonamide resistant sul                          | antibiotic target replacement | DQ464881  |
| sulA     | Sulfonamides | sulfonamide resistant sul                          | antibiotic inactivation       | KJ831060  |
| fosA3    | Fosfomycin   | glutathione S-transferase                          | antibiotic inactivation       | KX245440  |
| fosA     | Fosfomycin   | glutathione S-transferase                          | antibiotic inactivation       | M85195    |
| fosB     | Fosfomycin   | fosfomycin thiol transferase                       | antibiotic inactivation       | X89875    |
| fosXCC   | Fosfomycin   | fosfomycin thiol transferase                       | antibiotic inactivation       | KC876749  |
| fosX     | Fosfomycin   | fosfomycin thiol transferase                       | antibiotic inactivation       | NG_047899 |
| vatA     | MLSB         | streptogramin vat acetyltransferase                | antibiotic inactivation       | L07778    |

|        |      |                                                            |                              |           |
|--------|------|------------------------------------------------------------|------------------------------|-----------|
| vatB   | MLSB | streptogramin vat acetyltransferase                        | antibiotic inactivation      | U19459    |
| vatC   | MLSB | streptogramin vat acetyltransferase                        | antibiotic inactivation      | AF015628  |
| vatE   | MLSB | streptogramin vat acetyltransferase                        | antibiotic inactivation      | AF242872  |
| vgaA   | MLSB | ATP-binding cassette (ABC) antibiotic efflux pump          | antibiotic efflux            | M90056    |
| vgaA-V | MLSB | ATP-binding cassette (ABC) antibiotic efflux pump          | antibiotic efflux            | AF186237  |
| vgaB   | MLSB | ATP-binding cassette (ABC) antibiotic efflux pump          | antibiotic efflux            | U82085    |
| vgaC   | MLSB | ATP-binding cassette (ABC) antibiotic efflux pump          | antibiotic efflux            | NG_048559 |
| vgaE   | MLSB | ATP-binding cassette (ABC) antibiotic efflux pump          | antibiotic efflux            | FR772051  |
| vgbB   | MLSB | streptogramin vgb lyase                                    | antibiotic inactivation      | AF015628  |
| lnuA   | MLSB | lincosamide nucleotidyltransferase (LNU)                   | antibiotic inactivation      | M14039    |
| lnuB   | MLSB | lincosamide nucleotidyltransferase (LNU)                   | antibiotic inactivation      | AJ238249  |
| lnuC   | MLSB | lincosamide nucleotidyltransferase (LNU)                   | antibiotic inactivation      | AY928180  |
| lmrA   | MLSB | lmrAB opero                                                | antibiotic target protection | X59926    |
| lsaB   | MLSB | ATP-binding cassette (ABC) antibiotic efflux pump          | antibiotic efflux            | NG_047933 |
| lsaE   | MLSB | ATP-binding cassette (ABC) antibiotic efflux pump          | antibiotic efflux            | JX560992  |
| speA   | MLSB | other/efflux                                               | antibiotic efflux            | KY594413  |
| ereA-2 | MLSB | macrolide esterase                                         | antibiotic inactivation      | AF099140  |
| ereB   | MLSB | macrolide esterase                                         | antibiotic inactivation      | X03988    |
| mefB   | MLSB | major facilitator superfamily (MFS) antibiotic efflux pump | antibiotic efflux            | FJ196385  |
| mphA   | MLSB | macrolide phosphotransferase (MPH)                         | antibiotic inactivation      | D16251    |
| mphB   | MLSB | macrolide phosphotransferase (MPH)                         | antibiotic inactivation      | D85892    |
| mphC   | MLSB | macrolide phosphotransferase (MPH)                         | antibiotic inactivation      | AB013298  |
| mefA   | MLSB | major facilitator superfamily (MFS) antibiotic efflux pump | antibiotic efflux            | AF227521  |
| msrD   | MLSB | ATP-binding cassette (ABC) antibiotic efflux pump          | antibiotic efflux            | AF274302  |
| msrA   | MLSB | ATP-binding cassette (ABC) antibiotic efflux pump          | antibiotic efflux            | X52085    |
| msrC   | MLSB | ATP-binding cassette (ABC) antibiotic efflux pump          | antibiotic efflux            | AY004350  |

|         |           |                                                                  |                              |          |
|---------|-----------|------------------------------------------------------------------|------------------------------|----------|
| erm34   | MLSB      | Erm 23S ribosomal RNA methyltransferase                          | antibiotic target alteration | AY234334 |
| erm35   | MLSB      | Erm 23S ribosomal RNA methyltransferase                          | antibiotic target alteration | AF319779 |
| erm36   | MLSB      | Erm 23S ribosomal RNA methyltransferase                          | antibiotic target alteration | AF462611 |
| ermA    | MLSB      | Erm 23S ribosomal RNA methyltransferase                          | antibiotic target alteration | X03216   |
| ermB-18 | MLSB      | Erm 23S ribosomal RNA methyltransferase                          | antibiotic target alteration | X66468   |
| ermC    | MLSB      | Erm 23S ribosomal RNA methyltransferase                          | antibiotic target alteration | V01278   |
| ermD    | MLSB      | Erm 23S ribosomal RNA methyltransferase                          | antibiotic target alteration | M29832   |
| ermE    | MLSB      | Erm 23S ribosomal RNA methyltransferase                          | antibiotic target alteration | X51891   |
| ermF    | MLSB      | Erm 23S ribosomal RNA methyltransferase                          | antibiotic target alteration | M17124   |
| ermG    | MLSB      | Erm 23S ribosomal RNA methyltransferase                          | antibiotic target alteration | M15332   |
| ermK    | MLSB      | Erm 23S ribosomal RNA methyltransferase                          | antibiotic target alteration | M77505   |
| ermT    | MLSB      | Erm 23S ribosomal RNA methyltransferase                          | antibiotic target alteration | M64090   |
| ermX    | MLSB      | Erm 23S ribosomal RNA methyltransferase                          | antibiotic target alteration | M36726   |
| ermY    | MLSB      | Erm 23S ribosomal RNA methyltransferase                          | antibiotic target alteration | AB014481 |
| mel     | MLSB      | ATP-binding cassette (ABC) antibiotic efflux pump                | antibiotic efflux            | KU984333 |
| oleC    | MLSB      | ATP-binding cassette (ABC) antibiotic efflux pump                | antibiotic efflux            | L06249   |
| oqxA    | Multidrug | resistance-nodulation-cell division (RND) antibiotic efflux pump | antibiotic efflux            | EU370913 |
| oqxB    | Multidrug | resistance-nodulation-cell division (RND) antibiotic efflux pump | antibiotic efflux            | EU370913 |
| cmeA    | Multidrug | resistance-nodulation-cell division (RND) antibiotic efflux pump | antibiotic efflux            | AB894099 |
| cmeB    | Multidrug | resistance-nodulation-cell division (RND) antibiotic efflux pump | antibiotic efflux            | AB894099 |
| cmeC    | Multidrug | resistance-nodulation-cell division (RND) antibiotic efflux pump | antibiotic efflux            | AB894099 |
| RE-cmeA | Multidrug | resistance-nodulation-cell division (RND) antibiotic efflux pump | antibiotic efflux            | KT778507 |
| RE-cmeB | Multidrug | resistance-nodulation-cell division (RND) antibiotic efflux pump | antibiotic efflux            | KT778507 |
| RE-cmeC | Multidrug | resistance-nodulation-cell division (RND) antibiotic efflux pump | antibiotic efflux            | KT778507 |
| tolC    | Multidrug | resistance-nodulation-cell division (RND) antibiotic efflux pump | antibiotic efflux            | FJ768952 |
| mepA    | Multidrug | multidrug and toxic compound extrusion (MATE) transporter        | antibiotic efflux            | AY661734 |

|        |                  |                                                                  |                         |           |
|--------|------------------|------------------------------------------------------------------|-------------------------|-----------|
| ceoA   | Multidrug        | resistance-nodulation-cell division (RND) antibiotic efflux pump | antibiotic efflux       | U97042    |
| adeA   | Multidrug        | resistance-nodulation-cell division (RND) antibiotic efflux pump | antibiotic efflux       | KX154813  |
| cmr    | Multidrug        | major facilitator superfamily (MFS) antibiotic efflux pump       | antibiotic efflux       | U44900    |
| mdet1  | Multidrug        | major facilitator superfamily (MFS) antibiotic efflux pump       | antibiotic inactivation | AJ012115  |
| mdtE   | Multidrug        | resistance-nodulation-cell division (RND) antibiotic efflux pump | antibiotic inactivation | NC_000913 |
| pikR1  | Multidrug        | erm_methylase                                                    | antibiotic inactivation | AF079138  |
| pikR2  | Multidrug        | erm_methyltransferase                                            | antibiotic inactivation | AF079138  |
| mtrC   | Multidrug        | resistance-nodulation-cell division (RND) antibiotic efflux pump | antibiotic efflux       | HQ712081  |
| mtrD   | Multidrug        | resistance-nodulation-cell division (RND) antibiotic efflux pump | antibiotic efflux       | HQ706341  |
| qacH   | Multidrug        | small multidrug resistanc (SMR) efflux pump                      | antibiotic efflux       | AY816216  |
| qac    | Multidrug        | small multidrug resistanc (SMR) efflux pump                      | antibiotic efflux       | U81980    |
| rarD   | Multidrug        | major facilitator superfamily (MFS) antibiotic efflux pump       | antibiotic efflux       | L02122    |
| sdeB   | Multidrug        | resistance-nodulation-cell division (RND) antibiotic efflux pump | antibiotic efflux       | CP033162  |
| ttgA   | Multidrug        | resistance-nodulation-cell division (RND) antibiotic efflux pump | antibiotic efflux       | AF031417  |
| ttgB   | Multidrug        | resistance-nodulation-cell division (RND) antibiotic efflux pump | antibiotic efflux       | AF031417  |
| qacA   | Multidrug        | small multidrug resistanc (SMR) efflux pump                      | antibiotic efflux       | NG_061385 |
| qacE   | Multidrug        | small multidrug resistanc (SMR) efflux pump                      | antibiotic efflux       | FJ663011  |
| nisB   | Multidrug        | resistance-nodulation-cell division (RND) antibiotic efflux pump | antibiotic efflux       | X68307    |
| bacA   | Bacitracin       | undecaprenol kinase                                              | antibiotic inactivation | AF169967  |
| bcrB   | Bacitracin       | ATP-binding cassette (ABC) efflux pump                           | antibiotic efflux       | KX772240  |
| bcrR   | Bacitracin       | ATP-binding cassette (ABC) efflux pump                           | antibiotic efflux       | KX772240  |
| nimE   | Nitroimidazoles  | pyridoxamine 5'-phosphate oxidase protein                        | antibiotic inactivation | NG_048015 |
| pncA   | Antituberculosis | Other/efflux                                                     | antibiotic inactivation | KY659393  |
| sat    | Others           | Transposase                                                      | transposase             | AB699882  |
| IS613  | Others           | Transposase                                                      | transposase             | MH025900  |
| ISAPI1 | Others           | Transposase                                                      | transposase             | MF175187  |

|         |          |                                                                  |                           |              |
|---------|----------|------------------------------------------------------------------|---------------------------|--------------|
| ISAb125 | Others   | Transposase                                                      | transposase               | NC_022740    |
| Tn21    | Others   | Transposase                                                      | transposase               | KY913897     |
| Tp614   | Others   | Transposase                                                      | transposase               | DQ831146     |
| tnpA    | Others   | Transposase                                                      | transposase               | JX570731     |
| intl1   | Others   | integron integrase                                               | integron                  | NZ_CP039294  |
| merA    | Hg       | mercury(II) reductase                                            | metal ions reduction      | AB024961     |
| merB    | Hg       | Organomercurial lyase                                            | organometallics reduction | HQ144191     |
| pbrD    | Pb       | Lead binding protein                                             | metal ions binding        | X71400       |
| cadB    | Cd       | Cadmium binding protein                                          | metal ions binding        | M67452       |
| cadD    | Cd       | Cadmium binding protein                                          | metal ions binding        | AF134905     |
| copA    | Co       | P-type ATPases                                                   | metal accumulation        | AF187849     |
| copB    | Co       | P-type ATPases                                                   | metal accumulation        | AF187849     |
| cueO    | Co       | Copper detoxification                                            | metal ions oxidation      | NC_000913    |
| cusF    | Co       | Copper accumulation                                              | metal binding             | KC146966     |
| chrA    | Cr       | Chromate reductase                                               | metal ions binding        | NC_000964    |
| NiCotT  | Ni       | Nickel cobalt transferase                                        | metal accumulation        | FUGF01000049 |
| yfeA    | Zn       | periplasmic-binding protein; ABC transporter system              | metal transport           | U50597       |
| zntA    | Zn       | Zn(II)-export protein                                            | metal transport           | NC_000913    |
| zntB    | Zn       | Zn(II)-export protein                                            | metal transport           | NC_000913    |
| ceuE    | Fe       | siderophore transport protein                                    | metal transport           | FN555004     |
| czcA    | Co/Zn/Cd | resistance-nodulation-cell division (RND) antibiotic efflux pump | metal transport           | D67044       |
| czcC    | Co/Zn/Cd | outer membrane protein                                           | target protection         | D67044       |
| arsA    | As       | ATPase arsA                                                      | metal transport           | KY271405     |
| arsB    | As       | a membrane pump that functions alone or with ATPase arsA         | metal transport           | AB004659     |

**Table S2. 92 unique genes identified by AmpliSeq compared with MetaSeq.**

| <b>Classification</b> | <b>Resistance gene</b>      | <b>Mechanism</b>             | <b>Accession number</b> |
|-----------------------|-----------------------------|------------------------------|-------------------------|
| Quinolone             | <i>qnrA1</i>                | antibiotic target protection | AY070235                |
|                       | <i>qnrC</i>                 | antibiotic target protection | EU917444                |
|                       | <i>aac6-II</i>              | antibiotic inactivation      | L12710                  |
|                       | <i>aac6-ly</i>              | antibiotic inactivation      | AF144880                |
|                       | <i>aadA</i>                 | antibiotic inactivation      | MH257908                |
|                       | <i>aadD-1</i>               | antibiotic inactivation      | AF181950                |
| Aminoglycoside        | <i>aph2-Id</i>              | antibiotic inactivation      | AF016483                |
|                       | <i>armA</i>                 | antibiotic target alteration | AY220558                |
|                       | <i>rmtf</i>                 | antibiotic target alteration | JQ808129                |
|                       | <i>spcN</i>                 | antibiotic inactivation      | AF170704                |
|                       | <i>strB</i>                 | antibiotic inactivation      | EF493834                |
|                       | <i>npmA</i>                 | antibiotic target alteration | AB261016                |
|                       | <i>bla1</i>                 | antibiotic inactivation      | AF367983                |
|                       | <i>bla<sub>CMY</sub></i>    | antibiotic inactivation      | X92508                  |
|                       | <i>bla<sub>DHA</sub></i>    | antibiotic inactivation      | Y16410                  |
| $\beta$ -Lactamase    | <i>bla<sub>GES-1</sub></i>  | antibiotic inactivation      | HQ170511                |
|                       | <i>bla<sub>KPC-1</sub></i>  | antibiotic inactivation      | AF297554                |
|                       | <i>bla<sub>OCH</sub></i>    | antibiotic inactivation      | LT840075                |
|                       | <i>bla<sub>OKP</sub></i>    | antibiotic inactivation      | NG_049360               |
|                       | <i>bla<sub>OXA-23</sub></i> | antibiotic inactivation      | FJ959346                |



|              |                              |                              |              |
|--------------|------------------------------|------------------------------|--------------|
|              | <i>bla</i> <sub>OXA-51</sub> | antibiotic inactivation      | AJ309734     |
|              | <i>bla</i> <sub>OXA-58</sub> | antibiotic inactivation      | AY665723     |
|              | <i>bla</i> <sub>OXY-1</sub>  | antibiotic inactivation      | Z30177       |
|              | <i>bla</i> <sub>PAO-1</sub>  | antibiotic inactivation      | AY083595     |
|              | <i>bla</i> <sub>PER-1</sub>  | antibiotic inactivation      | GU944725     |
|              | <i>bla</i> <sub>PER-2</sub>  | antibiotic inactivation      | X93314       |
|              | <i>bla</i> <sub>PSE-1</sub>  | antibiotic inactivation      | M69058       |
|              | <i>bla</i> <sub>ROB-1</sub>  | antibiotic inactivation      | DQ840517     |
|              | <i>bla</i> <sub>SHV-1</sub>  | antibiotic inactivation      | AF148850     |
|              | <i>bla</i> <sub>SPM-1</sub>  | antibiotic inactivation      | AY341249     |
|              | <i>bla</i> <sub>VIM-2</sub>  | antibiotic inactivation      | KC907378     |
|              | <i>cepA</i>                  | antibiotic inactivation      | L13472       |
|              | <i>pbp2a</i>                 | antibiotic target protection | AF101780     |
|              | <i>pbp5</i>                  | antibiotic target protection | AF375986     |
|              | <i>tet32</i>                 | antibiotic target protection | EU722333     |
|              | <i>tetB</i>                  | antibiotic efflux            | AP000342     |
|              | <i>tetD</i>                  | antibiotic efflux            | AF467077     |
|              | <i>tetE</i>                  | antibiotic efflux            | L06940       |
| Tetracycline | <i>tetH</i>                  | antibiotic efflux            | Y16103       |
|              | <i>tetJ-1</i>                | antibiotic efflux            | ACLE01000065 |
|              | <i>tetS-3</i>                | antibiotic target protection | X92946       |
|              | <i>tetU</i>                  | antibiotic efflux            | U01917       |
| Polypeptide  | <i>vanA</i>                  | antibiotic target alteration | FJ866609     |

|              |                |                               |           |
|--------------|----------------|-------------------------------|-----------|
|              | <i>vanB</i>    | antibiotic target alteration  | AF192329  |
|              | <i>vanC</i>    | antibiotic target alteration  | EU151752  |
|              | <i>vanHB-1</i> | antibiotic target alteration  | AF192329  |
|              | <i>vanRA</i>   | antibiotic target alteration  | FJ866609  |
|              | <i>vanRB</i>   | antibiotic target alteration  | AF192329  |
|              | <i>vanSB-1</i> | antibiotic target alteration  | AF192329  |
|              | <i>vanTC</i>   | antibiotic target alteration  | AF162694  |
|              | <i>vanTG-1</i> | antibiotic target alteration  | AY271782  |
|              | <i>vanXA-1</i> | antibiotic target alteration  | FJ866609  |
|              | <i>vanRC</i>   | antibiotic target alteration  | EU151753  |
|              | <i>vanSA</i>   | antibiotic target alteration  | M97297    |
|              | <i>vanSC</i>   | antibiotic target alteration  | AF162694  |
|              | <i>mcr-2</i>   | antibiotic target alteration  | LT598652  |
|              | <i>mcr-4</i>   | antibiotic target alteration  | MF543359  |
|              | <i>mcr-5</i>   | antibiotic target alteration  | KY807921  |
|              | <i>mcr-6</i>   | antibiotic target alteration  | MF176240  |
|              | <i>mcr-7</i>   | antibiotic target alteration  | MG267386  |
|              | <i>mcr-8</i>   | antibiotic target alteration  | MG736312  |
| Sulfonamides | <i>dfrA1</i>   | antibiotic target replacement | MH574896  |
| MLSB         | <i>vatA</i>    | antibiotic inactivation       | L07778    |
|              | <i>vatC</i>    | antibiotic inactivation       | AF015628  |
|              | <i>vgaA</i>    | antibiotic efflux             | M90056    |
|              | <i>vgaA-V</i>  | antibiotic efflux             | AF186237  |
|              | <i>vgaC</i>    | antibiotic efflux             | NG_048559 |

|           |                |                              |           |
|-----------|----------------|------------------------------|-----------|
|           | <i>vgaE</i>    | antibiotic efflux            | FR772051  |
|           | <i>vgbB</i>    | antibiotic inactivation      | AF015628  |
|           | <i>lnuC</i>    | antibiotic inactivation      | AY928180  |
|           | <i>lmrA</i>    | antibiotic target protection | X59926    |
|           | <i>lsaB</i>    | antibiotic efflux            | NG_047933 |
|           | <i>ereA-2</i>  | antibiotic inactivation      | AF099140  |
|           | <i>ereB</i>    | antibiotic inactivation      | X03988    |
|           | <i>mphB</i>    | antibiotic inactivation      | D85892    |
|           | <i>msrA</i>    | antibiotic efflux            | X52085    |
|           | <i>msrC</i>    | antibiotic efflux            | AY004350  |
|           | <i>erm34</i>   | antibiotic target alteration | AY234334  |
|           | <i>erm35</i>   | antibiotic target alteration | AF319779  |
|           | <i>ermD</i>    | antibiotic target alteration | M29832    |
|           | <i>ermK</i>    | antibiotic target alteration | M77505    |
|           | <i>cmeB</i>    | antibiotic efflux            | AB894099  |
|           | <i>RE-cmeA</i> | antibiotic efflux            | KT778507  |
|           | <i>RE-cmeB</i> | antibiotic efflux            | KT778507  |
| Multidrug | <i>RE-cmeC</i> | antibiotic efflux            | KT778507  |
|           | <i>adeA</i>    | antibiotic efflux            | KX154813  |
|           | <i>mdet1</i>   | antibiotic inactivation      | AJ012115  |
|           | <i>pikR1</i>   | antibiotic inactivation      | AF079138  |
|           | <i>pikR2</i>   | antibiotic inactivation      | AF079138  |

|             |                   |           |
|-------------|-------------------|-----------|
| <i>qac</i>  | antibiotic efflux | U81980    |
| <i>qacA</i> | antibiotic efflux | NG_061385 |
| <i>nisB</i> | antibiotic efflux | X68307    |

**Table S3. Identification of antibiotic efflux pump genes in poultry, swine, cow, and human samples.**

| Classification      | Resistance gene | Mechanism        | Poultry<br>(20 samples) | Swine<br>(16 samples) | Cow<br>(12 samples) | Human<br>(16 samples) | Total         |
|---------------------|-----------------|------------------|-------------------------|-----------------------|---------------------|-----------------------|---------------|
| Tetracycline        | <i>tetA</i>     |                  | 100%                    | 93.75%                | 100%                | 93.75%                | <b>96.88%</b> |
|                     | <i>tetAP</i>    |                  | 70.00%                  | 93.75%                | 100%                | 50.00%                | 76.56%        |
|                     | <i>tetB</i>     |                  | 100%                    | 75.00%                | 83.33%              | 43.75%                | 76.56%        |
|                     | <i>tetBP</i>    |                  | 85.00%                  | 93.75%                | 100%                | 75.00%                | 87.50%        |
|                     | <i>tetD</i>     |                  | 45.00%                  | —                     | 41.67%              | 18.75%                | 26.56%        |
|                     | <i>tetE</i>     |                  | 30.00%                  | 6.25%                 | 16.67%              | —                     | 14.06%        |
|                     | <i>tetG</i>     |                  | 100%                    | 81.25%                | 100%                | 6.25%                 | 71.88%        |
|                     | <i>tetH</i>     |                  | 85.00%                  | 75.00%                | 66.67%              | —                     | 57.81%        |
|                     | <i>tetK</i>     |                  | 85.00%                  | 18.75%                | 75.00%              | —                     | 45.31%        |
|                     | <i>tetL</i>     |                  | 100%                    | 75.00%                | 100%                | —                     | 68.75%        |
|                     | <i>tetU</i>     |                  | —                       | —                     | —                   | 6.25%                 | 1.56%         |
|                     | <i>tetV</i>     |                  | 10.00%                  | —                     | 25.00%              | —                     | 7.81%         |
| Chloramphenico<br>I | <i>optrA</i>    | ABC <sup>b</sup> | 100%                    | 43.75%                | 100%                | —                     | 60.94%        |
|                     | <i>cmIA1</i>    | MFS <sup>c</sup> | 100%                    | 93.75%                | 100%                | 87.50%                | 95.31%        |
|                     | <i>cmx</i>      |                  | 100%                    | 93.75%                | 100%                | 6.25%                 | 75.00%        |

|                               |              |                  |        |        |        |        |             |
|-------------------------------|--------------|------------------|--------|--------|--------|--------|-------------|
|                               | <i>fexA</i>  |                  | 100%   | 62.50% | 100%   | 12.50% | 68.75%      |
|                               | <i>floR</i>  |                  | 100%   | 100%   | 100%   | 100%   | <b>100%</b> |
|                               | <i>lsaB</i>  |                  | 50.00% | 18.75% | 58.33% | —      | 31.25%      |
|                               | <i>lsaE</i>  |                  | 95.00% | 100%   | 100%   | 18.75% | 78.13%      |
|                               | <i>mel</i>   |                  | 100%   | 93.75% | 91.67% | 6.25%  | 73.44%      |
|                               | <i>msrA</i>  |                  | 50.00% | 6.25%  | 41.67% | —      | 25.00%      |
|                               | <i>msrC</i>  | ABC <sup>b</sup> | 35.00% | 18.75% | —      | 31.25% | 23.44%      |
|                               | <i>msrD</i>  |                  | 90.00% | 93.75% | 100%   | 93.75% | 93.75%      |
| MLS <sup>B</sup> <sup>a</sup> | <i>vgaA</i>  |                  | 15.00% | —      | —      | —      | 4.69%       |
|                               | <i>vgaAV</i> |                  | 20.00% | —      | 8.33%  | —      | 7.81%       |
|                               | <i>vgaC</i>  |                  | 75.00% | —      | 8.33%  | —      | 25.00%      |
|                               | <i>vgaE</i>  |                  | 90.00% | 6.25%  | 66.67% | —      | 42.19%      |
|                               | <i>mefA</i>  |                  | 95.00% | 93.75% | 100%   | 93.75% | 95.31%      |
|                               | <i>mefB</i>  | MFS <sup>c</sup> | 85.00% | 50.00% | 100%   | 18.75% | 62.50%      |
| <i>oleC</i>                   | 30.00%       |                  | 18.75% | 50.00% | —      | 23.44% |             |
| Bacitracin                    | <i>bcrB</i>  | ABC <sup>b</sup> | 100%   | 12.50% | 100%   | 75.00% | 71.88%      |
|                               | <i>bcrR</i>  |                  | 90.00% | 12.50% | 100%   | —      | 50.00%      |
|                               | <i>cmr</i>   | MFS <sup>c</sup> | 95.00% | 93.75% | 91.67% | 93.75% | 93.75%      |
| <i>rarD</i>                   | 90.00%       |                  | 87.50% | 91.67% | 93.75% | 90.63% |             |
| Multidrug                     | <i>adeA</i>  |                  | 5.00%  | —      | —      | —      | 1.56%       |
|                               | <i>ceoA</i>  | RND <sup>d</sup> | 15.00% | —      | —      | —      | 4.69%       |
|                               | <i>cmeA</i>  |                  | 15.00% | —      | —      | —      | 4.69%       |
|                               | <i>cmeB</i>  |                  | 20.00% | —      | —      | —      | 6.25%       |

|                |                  |        |        |        |        |               |
|----------------|------------------|--------|--------|--------|--------|---------------|
| <i>cmeC</i>    |                  | 10.00% | —      | —      | —      | 3.13%         |
| <i>mdtE</i>    |                  | 100%   | 93.75% | 91.67% | 87.50% | 93.75%        |
| <i>mtrD</i>    |                  | —      | —      | 16.67% | —      | 3.13%         |
| <i>nisB</i>    |                  | 5.00%  | 6.25%  | —      | —      | 3.13%         |
| <i>oqxA</i>    |                  | 95.00% | 56.25% | 66.67% | 93.75% | 79.69%        |
| <i>oqxB</i>    |                  | 100%   | 87.50% | 91.67% | 93.75% | 93.75%        |
| <i>RE-cmeA</i> |                  | 20.00% | —      | —      | —      | 4.69%         |
| <i>RE-cmeB</i> |                  | 20.00% | —      | —      | —      | 6.25%         |
| <i>RE-cmeC</i> |                  | 20.00% | —      | —      | —      | 6.25%         |
| <i>sdeB</i>    |                  | 60.00% | 31.25% | 50.00% | 37.50% | 45.31%        |
| <i>tolC</i>    |                  | 100%   | 93.75% | 91.67% | 100%   | <b>96.88%</b> |
| <i>ttgA</i>    |                  | 25.00% | 6.25%  | 41.67% | —      | 17.19%        |
| <i>ttgB</i>    |                  | 35.00% | 18.75% | 58.33% | —      | 26.56%        |
| <i>qac</i>     |                  | 5.00%  | —      | —      | —      | 1.56%         |
| <i>qacA</i>    | SMR <sup>e</sup> | 5.00%  | —      | 8.33%  | —      | 3.13%         |
| <i>qacE</i>    |                  | 10.00% | 31.25% | 25.00% | —      | 17.19%        |
| <i>qacH</i>    |                  | 100%   | 56.25% | 91.67% | 12.50% | 65.63%        |

a: MLSB: Macrolide-lincosamide-streptogramin B; b: ABC: ATP-binding cassette antibiotic efflux pump; c: MFS: major facilitator superfamily antibiotic efflux pump; d: RND: resistance-nodulation-cell division antibiotic efflux pump; e: SMR: major facilitator superfamily antibiotic efflux pump.

**Table S4. Comparison of amplicon sequencing in AmpliSeq and ATOplex technology**

| Sample  | AmpliSeq         |                      |             | ATOplex          |                      |             | Gain <sup>a</sup> |
|---------|------------------|----------------------|-------------|------------------|----------------------|-------------|-------------------|
|         | No. of raw reads | No. of aligned reads | Percent (%) | No. of raw reads | No. of aligned reads | Percent (%) |                   |
| N1      | 441,462          | 332,059              | 75.22       | 10,566,235       | 9,304,330            | 88.06       | 1.17              |
| N2      | 887,932          | 781,502              | 88.01       | 4,963,350        | 4,352,514            | 87.69       | 1.00              |
| N3      | 662,783          | 517,486              | 78.08       | 18,731,004       | 14,626,298           | 78.09       | 1.00              |
| N4      | 1,085,548        | 988,067              | 91.02       | 5,295,532        | 4,497,448            | 84.93       | 0.93              |
| Average | 769,431          | 654,779              | 85.10       | 9,889,030        | 8195147.5            | 82.87       | 0.97              |

a: The results of dividing on-target percentage of AmpliSeq by ATOplex.

**Table S5. The information of amplicon sequences**

| Target gene     | Start | End              | Pool   |
|-----------------|-------|------------------|--------|
| IS613_MH025900  | 32    | 215 AMPL3931677  | Pool=1 |
| IS613_MH025900  | 204   | 429 AMPL3931678  | Pool=2 |
| IS613_MH025900  | 418   | 638 AMPL3931679  | Pool=1 |
| IS613_MH025900  | 627   | 846 AMPL3931680  | Pool=2 |
| IS613_MH025900  | 835   | 1057 AMPL3931681 | Pool=1 |
| IS613_MH025900  | 1046  | 1247 AMPL3931682 | Pool=2 |
| ISAPI1_MF175187 | 24    | 233 AMPL3931683  | Pool=1 |
| ISAPI1_MF175187 | 222   | 426 AMPL3931684  | Pool=2 |
| ISAPI1_MF175187 | 415   | 555 AMPL3931685  | Pool=1 |

|                   |     |                 |        |
|-------------------|-----|-----------------|--------|
| ISAPI1_MF175187   | 544 | 662 AMPL3931686 | Pool=2 |
| ISAPI1_MF175187   | 651 | 873 AMPL3931687 | Pool=1 |
| ISAb125_NC_022740 | 51  | 155 AMPL3932028 | Pool=1 |
| ISAb125_NC_022740 | 144 | 364 AMPL3932029 | Pool=2 |
| ISAb125_NC_022740 | 353 | 568 AMPL3932030 | Pool=1 |
| ISAb125_NC_022740 | 557 | 767 AMPL3932031 | Pool=2 |
| ISAb125_NC_022740 | 756 | 950 AMPL3932032 | Pool=1 |
| QnrA1_1_AY070235  | 42  | 249 AMPL3931106 | Pool=1 |
| QnrA1_1_AY070235  | 238 | 454 AMPL3931107 | Pool=2 |
| QnrA1_1_AY070235  | 443 | 625 AMPL3931108 | Pool=1 |
| QnrB1_1_EF682133  | 54  | 182 AMPL3931109 | Pool=1 |
| QnrB1_1_EF682133  | 171 | 393 AMPL3931110 | Pool=2 |
| QnrB1_1_EF682133  | 382 | 605 AMPL3931111 | Pool=1 |
| QnrB4_1_DQ303921  | 58  | 154 AMPL3931112 | Pool=1 |
| QnrB4_1_DQ303921  | 143 | 365 AMPL3931113 | Pool=2 |
| QnrB4_1_DQ303921  | 354 | 582 AMPL3931114 | Pool=1 |
| QnrB8_1_EU043312  | 25  | 160 AMPL3931115 | Pool=2 |
| QnrB8_1_EU043312  | 149 | 373 AMPL3931116 | Pool=1 |
| QnrB8_1_EU043312  | 362 | 580 AMPL3931117 | Pool=2 |
| QnrC_1_EU917444   | 63  | 212 AMPL3931118 | Pool=1 |
| QnrC_1_EU917444   | 201 | 377 AMPL3931119 | Pool=2 |
| QnrC_1_EU917444   | 366 | 594 AMPL3931120 | Pool=1 |
| QnrD_1_FJ228229   | 36  | 223 AMPL3931121 | Pool=2 |
| QnrD_1_FJ228229   | 212 | 420 AMPL3931122 | Pool=1 |
| QnrD_1_FJ228229   | 409 | 575 AMPL3931123 | Pool=2 |
| QnrS1_1_AB187515  | 35  | 187 AMPL3931124 | Pool=1 |



|                   |      |                  |        |
|-------------------|------|------------------|--------|
| QnrS1_1_AB187515  | 176  | 375 AMPL3931125  | Pool=2 |
| QnrS1_1_AB187515  | 364  | 587 AMPL3931126  | Pool=1 |
| QnrS2_1_JF261185  | 22   | 225 AMPL3931127  | Pool=2 |
| QnrS2_1_JF261185  | 214  | 374 AMPL3931128  | Pool=1 |
| QnrS2_1_JF261185  | 363  | 587 AMPL3931129  | Pool=2 |
| QnrVC1_1_EU436855 | 52   | 189 AMPL3931130  | Pool=1 |
| QnrVC1_1_EU436855 | 178  | 380 AMPL3931131  | Pool=2 |
| QnrVC1_1_EU436855 | 369  | 587 AMPL3931132  | Pool=1 |
| RE_cmeA_KT778507  | 55   | 191 AMPL3931590  | Pool=2 |
| RE_cmeA_KT778507  | 180  | 390 AMPL3931591  | Pool=1 |
| RE_cmeA_KT778507  | 373  | 558 AMPL3931592  | Pool=2 |
| RE_cmeA_KT778507  | 544  | 733 AMPL3931593  | Pool=1 |
| RE_cmeA_KT778507  | 804  | 888 AMPL3931595  | Pool=2 |
| RE_cmeA_KT778507  | 862  | 1072 AMPL3931596 | Pool=1 |
| RE_cmeB_KT778507  | 50   | 125 AMPL3931597  | Pool=2 |
| RE_cmeB_KT778507  | 114  | 326 AMPL3931598  | Pool=1 |
| RE_cmeB_KT778507  | 315  | 521 AMPL3931599  | Pool=2 |
| RE_cmeB_KT778507  | 519  | 686 AMPL3931600  | Pool=1 |
| RE_cmeB_KT778507  | 675  | 880 AMPL3931601  | Pool=2 |
| RE_cmeB_KT778507  | 869  | 1032 AMPL3931602 | Pool=1 |
| RE_cmeB_KT778507  | 1070 | 1214 AMPL3931604 | Pool=2 |
| RE_cmeB_KT778507  | 1200 | 1344 AMPL3931605 | Pool=1 |
| RE_cmeB_KT778507  | 1333 | 1546 AMPL3931606 | Pool=2 |
| RE_cmeB_KT778507  | 1512 | 1704 AMPL3931607 | Pool=1 |
| RE_cmeB_KT778507  | 1693 | 1883 AMPL3931608 | Pool=2 |
| RE_cmeB_KT778507  | 1872 | 2083 AMPL3931609 | Pool=1 |

|                  |      |                  |        |
|------------------|------|------------------|--------|
| RE_cmeB_KT778507 | 2072 | 2258 AMPL3931610 | Pool=2 |
| RE_cmeB_KT778507 | 2237 | 2440 AMPL3931611 | Pool=1 |
| RE_cmeB_KT778507 | 2429 | 2515 AMPL3931612 | Pool=2 |
| RE_cmeB_KT778507 | 2504 | 2725 AMPL3931613 | Pool=1 |
| RE_cmeB_KT778507 | 2714 | 2939 AMPL3931614 | Pool=2 |
| RE_cmeC_KT778507 | 44   | 159 AMPL3929745  | Pool=1 |
| RE_cmeC_KT778507 | 148  | 298 AMPL3931619  | Pool=2 |
| RE_cmeC_KT778507 | 287  | 472 AMPL3931620  | Pool=1 |
| RE_cmeC_KT778507 | 461  | 671 AMPL3931621  | Pool=2 |
| RE_cmeC_KT778507 | 660  | 859 AMPL3931622  | Pool=1 |
| RE_cmeC_KT778507 | 848  | 1045 AMPL3931623 | Pool=2 |
| RE_cmeC_KT778507 | 1034 | 1247 AMPL3931624 | Pool=1 |
| RE_cmeC_KT778507 | 1236 | 1446 AMPL3931625 | Pool=2 |
| Tn21_KY913897    | 50   | 253 AMPL3931688  | Pool=1 |
| Tn21_KY913897    | 85   | 311 AMPL3931689  | Pool=2 |
| Tp614_DQ831146   | 46   | 260 AMPL3931706  | Pool=1 |
| Tp614_DQ831146   | 248  | 469 AMPL3931707  | Pool=2 |
| Tp614_DQ831146   | 458  | 687 AMPL3931708  | Pool=1 |
| Tp614_DQ831146   | 678  | 856 AMPL3931709  | Pool=2 |
| Tp614_DQ831146   | 845  | 1071 AMPL3931710 | Pool=1 |
| Tp614_DQ831146   | 1060 | 1254 AMPL3931711 | Pool=2 |
| VanB_1_AF192329  | 59   | 255 AMPL3931269  | Pool=1 |
| VanB_1_AF192329  | 244  | 382 AMPL3931270  | Pool=2 |
| VanB_1_AF192329  | 371  | 574 AMPL3931271  | Pool=1 |
| VanB_1_AF192329  | 563  | 786 AMPL3931272  | Pool=2 |
| VanB_1_AF192329  | 775  | 986 AMPL3931273  | Pool=1 |

|                  |     |                  |        |
|------------------|-----|------------------|--------|
| VanC_3_EU151752  | 44  | 268 AMPL3931278  | Pool=2 |
| VanC_3_EU151752  | 257 | 478 AMPL3931279  | Pool=1 |
| VanC_3_EU151752  | 467 | 589 AMPL3931280  | Pool=2 |
| VanC_3_EU151752  | 578 | 802 AMPL3931281  | Pool=1 |
| VanC_3_EU151752  | 791 | 1005 AMPL3931282 | Pool=2 |
| VanG_1_AY271782  | 41  | 235 AMPL3931283  | Pool=1 |
| VanG_1_AY271782  | 224 | 411 AMPL3931284  | Pool=2 |
| VanG_1_AY271782  | 400 | 619 AMPL3931285  | Pool=1 |
| VanG_1_AY271782  | 608 | 826 AMPL3931286  | Pool=2 |
| VanG_1_AY271782  | 815 | 980 AMPL3931287  | Pool=1 |
| VanHB_1_AF192329 | 47  | 273 AMPL3931288  | Pool=1 |
| VanHB_1_AF192329 | 262 | 437 AMPL3931289  | Pool=2 |
| VanHB_1_AF192329 | 420 | 630 AMPL3931290  | Pool=1 |
| VanHB_1_AF192329 | 608 | 810 AMPL3931291  | Pool=2 |
| VanHB_1_AF192329 | 799 | 924 AMPL3931292  | Pool=1 |
| VanHD_1_AB242319 | 38  | 238 AMPL3931293  | Pool=2 |
| VanHD_1_AB242319 | 227 | 365 AMPL3931294  | Pool=1 |
| VanHD_1_AB242319 | 354 | 568 AMPL3931295  | Pool=2 |
| VanHD_1_AB242319 | 557 | 700 AMPL3931296  | Pool=1 |
| VanHD_1_AB242319 | 689 | 907 AMPL3931297  | Pool=2 |
| VanM_AF288163    | 50  | 241 AMPL3932015  | Pool=1 |
| VanM_AF288163    | 230 | 417 AMPL3932016  | Pool=2 |
| VanM_AF288163    | 406 | 583 AMPL3932017  | Pool=1 |
| VanM_AF288163    | 572 | 794 AMPL3932018  | Pool=2 |
| VanM_AF288163    | 783 | 1000 AMPL3932019 | Pool=1 |
| VanM_AF288163    | 989 | 1158 AMPL3932020 | Pool=2 |

|                  |      |                  |        |
|------------------|------|------------------|--------|
| VanRA_1_FJ866609 | 45   | 257 AMPL3931298  | Pool=1 |
| VanRA_1_FJ866609 | 246  | 416 AMPL3931299  | Pool=2 |
| VanRA_1_FJ866609 | 405  | 625 AMPL3931300  | Pool=1 |
| VanRB_1_AF192329 | 26   | 249 AMPL3931301  | Pool=1 |
| VanRB_1_AF192329 | 238  | 449 AMPL3931302  | Pool=2 |
| VanRB_1_AF192329 | 438  | 604 AMPL3931303  | Pool=1 |
| VanRC_1_AF162694 | 44   | 251 AMPL3931304  | Pool=2 |
| VanRC_1_AF162694 | 240  | 406 AMPL3931305  | Pool=1 |
| VanRC_1_AF162694 | 395  | 624 AMPL3931306  | Pool=2 |
| VanRD_1_AB242319 | 38   | 208 AMPL3931310  | Pool=1 |
| VanRD_1_AB242319 | 197  | 423 AMPL3931311  | Pool=2 |
| VanRD_1_AB242319 | 412  | 627 AMPL3931312  | Pool=1 |
| VanSA_M97297     | 53   | 177 AMPL3932009  | Pool=2 |
| VanSA_M97297     | 166  | 300 AMPL3932010  | Pool=1 |
| VanSA_M97297     | 289  | 507 AMPL3932011  | Pool=2 |
| VanSA_M97297     | 496  | 721 AMPL3932012  | Pool=1 |
| VanSA_M97297     | 710  | 932 AMPL3932013  | Pool=2 |
| VanSA_M97297     | 921  | 1100 AMPL3932014 | Pool=1 |
| VanSB_1_AF192329 | 30   | 242 AMPL3931313  | Pool=2 |
| VanSB_1_AF192329 | 231  | 414 AMPL3931314  | Pool=1 |
| VanSB_1_AF192329 | 403  | 605 AMPL3931315  | Pool=2 |
| VanSB_1_AF192329 | 594  | 761 AMPL3931316  | Pool=1 |
| VanSB_1_AF192329 | 750  | 966 AMPL3931317  | Pool=2 |
| VanSB_1_AF192329 | 955  | 1122 AMPL3931318 | Pool=1 |
| VanSB_1_AF192329 | 1111 | 1297 AMPL3931319 | Pool=2 |
| VanTC_1_AF162694 | 70   | 274 AMPL3931329  | Pool=1 |

|                  |      |                  |        |
|------------------|------|------------------|--------|
| VanTC_1_AF162694 | 263  | 486 AMPL3931330  | Pool=2 |
| VanTC_1_AF162694 | 475  | 628 AMPL3931331  | Pool=1 |
| VanTC_1_AF162694 | 617  | 838 AMPL3931332  | Pool=2 |
| VanTC_1_AF162694 | 827  | 1052 AMPL3931333 | Pool=1 |
| VanTC_1_AF162694 | 1041 | 1238 AMPL3931334 | Pool=2 |
| VanTC_1_AF162694 | 1227 | 1416 AMPL3931335 | Pool=1 |
| VanTC_1_AF162694 | 1405 | 1624 AMPL3931336 | Pool=2 |
| VanTC_1_AF162694 | 1613 | 1831 AMPL3931337 | Pool=1 |
| VanTC_1_AF162694 | 1823 | 2033 AMPL3931338 | Pool=2 |
| VanTG_1_AY271782 | 69   | 288 AMPL3931350  | Pool=1 |
| VanTG_1_AY271782 | 277  | 395 AMPL3931351  | Pool=2 |
| VanTG_1_AY271782 | 384  | 590 AMPL3931352  | Pool=1 |
| VanTG_1_AY271782 | 572  | 771 AMPL3931353  | Pool=2 |
| VanTG_1_AY271782 | 760  | 955 AMPL3931354  | Pool=1 |
| VanTG_1_AY271782 | 944  | 1163 AMPL3931355 | Pool=2 |
| VanTG_1_AY271782 | 1152 | 1376 AMPL3931356 | Pool=1 |
| VanTG_1_AY271782 | 1365 | 1565 AMPL3931357 | Pool=2 |
| VanTG_1_AY271782 | 1554 | 1779 AMPL3931358 | Pool=1 |
| VanTG_1_AY271782 | 1768 | 1858 AMPL3931359 | Pool=2 |
| VanTG_1_AY271782 | 1847 | 2069 AMPL3931360 | Pool=1 |
| VanWB_1_AF192329 | 28   | 169 AMPL3931361  | Pool=1 |
| VanWB_1_AF192329 | 158  | 378 AMPL3931362  | Pool=2 |
| VanWB_1_AF192329 | 367  | 559 AMPL3931363  | Pool=1 |
| VanWB_1_AF192329 | 548  | 759 AMPL3931364  | Pool=2 |
| VanWG_1_AY271782 | 53   | 271 AMPL3931365  | Pool=1 |
| VanWG_1_AY271782 | 260  | 446 AMPL3931366  | Pool=2 |

|                  |     |                  |        |
|------------------|-----|------------------|--------|
| VanWG_1_AY271782 | 431 | 597 AMPL3931367  | Pool=1 |
| VanWG_1_AY271782 | 586 | 779 AMPL3931368  | Pool=2 |
| VanXA_1_FJ866609 | 49  | 147 AMPL3929264  | Pool=1 |
| VanXA_1_FJ866609 | 136 | 359 AMPL3931369  | Pool=2 |
| VanXA_1_FJ866609 | 348 | 540 AMPL3931370  | Pool=1 |
| VanXB_1_AF192329 | 44  | 214 AMPL3931371  | Pool=1 |
| VanXB_1_AF192329 | 203 | 355 AMPL3931372  | Pool=2 |
| VanXB_1_AF192329 | 344 | 539 AMPL3931373  | Pool=1 |
| VanXD_1_AB242319 | 36  | 257 AMPL3931374  | Pool=1 |
| VanXD_1_AB242319 | 246 | 414 AMPL3931375  | Pool=2 |
| VanXD_1_AB242319 | 398 | 539 AMPL3931376  | Pool=1 |
| VanYB_1_AF192329 | 33  | 199 AMPL3931377  | Pool=2 |
| VanYB_1_AF192329 | 188 | 372 AMPL3931378  | Pool=1 |
| VanYB_1_AF192329 | 361 | 588 AMPL3931379  | Pool=2 |
| VanYB_1_AF192329 | 577 | 749 AMPL3931380  | Pool=1 |
| VanYD_1_AB242319 | 28  | 194 AMPL3931381  | Pool=2 |
| VanYD_1_AB242319 | 183 | 408 AMPL3931382  | Pool=1 |
| VanYD_1_AB242319 | 397 | 582 AMPL3931383  | Pool=2 |
| VanYD_1_AB242319 | 571 | 788 AMPL3931384  | Pool=1 |
| VanYD_1_AB242319 | 777 | 1004 AMPL3931385 | Pool=2 |
| aac6_II_L12710   | 67  | 278 AMPL3931489  | Pool=1 |
| aac6_II_L12710   | 267 | 492 AMPL3931490  | Pool=2 |
| aac6_la_1_M18967 | 34  | 103 AMPL3930982  | Pool=1 |
| aac6_la_1_M18967 | 92  | 286 AMPL3930983  | Pool=2 |
| aac6_la_1_M18967 | 275 | 490 AMPL3930984  | Pool=1 |
| aac6_lb_JN108884 | 66  | 291 AMPL3931470  | Pool=1 |

|                    |      |                  |        |
|--------------------|------|------------------|--------|
| aac6_lb_JN108884   | 280  | 501 AMPL3931471  | Pool=2 |
| aac6_ly_AF144880   | 25   | 223 AMPL3931487  | Pool=1 |
| aac6_ly_AF144880   | 212  | 368 AMPL3931488  | Pool=2 |
| aacA_aphD_GU565967 | 87   | 190 AMPL3929480  | Pool=1 |
| aacA_aphD_GU565967 | 179  | 381 AMPL3931472  | Pool=2 |
| aacA_aphD_GU565967 | 342  | 421 AMPL3931473  | Pool=1 |
| aacA_aphD_GU565967 | 646  | 848 AMPL3931475  | Pool=2 |
| aacA_aphD_GU565967 | 656  | 868 AMPL3931476  | Pool=1 |
| aacA_aphD_GU565967 | 1082 | 1235 AMPL3931478 | Pool=2 |
| aacA_aphD_GU565967 | 1195 | 1384 AMPL3931479 | Pool=1 |
| aacC1_U04610       | 59   | 192 AMPL3931402  | Pool=2 |
| aacC1_U04610       | 181  | 409 AMPL3931403  | Pool=1 |
| aacC1_U04610       | 398  | 482 AMPL3929333  | Pool=2 |
| aacC2_AY138987     | 26   | 188 AMPL3931492  | Pool=1 |
| aacC2_AY138987     | 174  | 375 AMPL3931493  | Pool=2 |
| aacC2_AY138987     | 309  | 536 AMPL3931494  | Pool=1 |
| aacC2_AY138987     | 507  | 617 AMPL3931495  | Pool=2 |
| aacC2_AY138987     | 606  | 839 AMPL3931496  | Pool=1 |
| aac_1_AJ628983     | 70   | 286 AMPL3930980  | Pool=1 |
| aac_1_AJ628983     | 275  | 503 AMPL3931491  | Pool=2 |
| aadA1_KR610434     | 59   | 283 AMPL3931503  | Pool=1 |
| aadA1_KR610434     | 272  | 482 AMPL3931504  | Pool=2 |
| aadA1_KR610434     | 471  | 685 AMPL3931505  | Pool=1 |
| aadA1_KR610434     | 674  | 759 AMPL3929539  | Pool=2 |
| aadA2_2_JQ364967   | 28   | 154 AMPL3928543  | Pool=1 |
| aadA2_2_JQ364967   | 143  | 346 AMPL3930988  | Pool=2 |

|                  |     |                 |        |
|------------------|-----|-----------------|--------|
| aadA2_2_JQ364967 | 335 | 498 AMPL3930989 | Pool=1 |
| aadA2_2_JQ364967 | 487 | 685 AMPL3930990 | Pool=2 |
| aadA2_2_JQ364967 | 674 | 752 AMPL3928550 | Pool=1 |
| aadA5_KT175895   | 24  | 194 AMPL3931506 | Pool=2 |
| aadA5_KT175895   | 152 | 376 AMPL3931507 | Pool=1 |
| aadA5_KT175895   | 365 | 591 AMPL3931508 | Pool=2 |
| aadA5_KT175895   | 580 | 743 AMPL3931509 | Pool=1 |
| aadA9_1_AJ420072 | 26  | 227 AMPL3930991 | Pool=2 |
| aadA9_1_AJ420072 | 216 | 417 AMPL3930992 | Pool=1 |
| aadA9_1_AJ420072 | 406 | 559 AMPL3930993 | Pool=2 |
| aadA9_1_AJ420072 | 548 | 772 AMPL3930994 | Pool=1 |
| aadA_MH257908    | 68  | 277 AMPL3931497 | Pool=1 |
| aadA_MH257908    | 265 | 411 AMPL3931498 | Pool=2 |
| aadA_MH257908    | 400 | 607 AMPL3931499 | Pool=1 |
| aadA_MH257908    | 596 | 734 AMPL3931500 | Pool=2 |
| aadD_1_AF181950  | 61  | 270 AMPL3930995 | Pool=1 |
| aadD_1_AF181950  | 259 | 481 AMPL3930996 | Pool=2 |
| aadD_1_AF181950  | 473 | 701 AMPL3930997 | Pool=1 |
| aadE_AB699882    | 53  | 210 AMPL3931510 | Pool=2 |
| aadE_AB699882    | 199 | 421 AMPL3931511 | Pool=1 |
| aadE_AB699882    | 410 | 484 AMPL3931512 | Pool=2 |
| aadE_AB699882    | 473 | 689 AMPL3931513 | Pool=1 |
| aadE_AB699882    | 678 | 863 AMPL3931514 | Pool=2 |
| adeA_KX154813    | 29  | 149 AMPL3931515 | Pool=1 |
| adeA_KX154813    | 138 | 343 AMPL3931516 | Pool=2 |
| adeA_KX154813    | 332 | 538 AMPL3931517 | Pool=1 |



|                    |     |                  |        |
|--------------------|-----|------------------|--------|
| adeA_KX154813      | 527 | 734 AMPL3931518  | Pool=2 |
| adeA_KX154813      | 723 | 943 AMPL3931519  | Pool=1 |
| adeA_KX154813      | 932 | 1143 AMPL3931520 | Pool=2 |
| aph2_Id_1_AF016483 | 32  | 252 AMPL3930998  | Pool=1 |
| aph2_Id_1_AF016483 | 241 | 317 AMPL3930999  | Pool=2 |
| aph2_Id_1_AF016483 | 306 | 507 AMPL3931000  | Pool=1 |
| aph2_Id_1_AF016483 | 502 | 694 AMPL3931001  | Pool=2 |
| aph2_Id_1_AF016483 | 683 | 844 AMPL3931002  | Pool=1 |
| aph6_la_1_AY971801 | 19  | 211 AMPL3931003  | Pool=1 |
| aph6_la_1_AY971801 | 140 | 330 AMPL3931004  | Pool=2 |
| aph6_la_1_AY971801 | 314 | 497 AMPL3931005  | Pool=1 |
| aph6_la_1_AY971801 | 486 | 723 AMPL3931006  | Pool=2 |
| aph6_la_1_AY971801 | 719 | 889 AMPL3931007  | Pool=1 |
| aphA1_HM146784     | 25  | 204 AMPL3931521  | Pool=2 |
| aphA1_HM146784     | 193 | 420 AMPL3931522  | Pool=1 |
| aphA1_HM146784     | 409 | 569 AMPL3931523  | Pool=2 |
| aphA1_HM146784     | 558 | 772 AMPL3931524  | Pool=1 |
| armA_1_AY220558    | 33  | 230 AMPL3931011  | Pool=2 |
| armA_1_AY220558    | 189 | 397 AMPL3931012  | Pool=1 |
| armA_1_AY220558    | 376 | 573 AMPL3931013  | Pool=2 |
| armA_1_AY220558    | 562 | 717 AMPL3931014  | Pool=1 |
| bacA_D85752        | 78  | 286 AMPL3931714  | Pool=2 |
| bcrB_KX772240      | 63  | 230 AMPL3931880  | Pool=1 |
| bcrB_KX772240      | 219 | 433 AMPL3931881  | Pool=2 |
| bcrB_KX772240      | 422 | 645 AMPL3931882  | Pool=1 |
| bcrR_KX772240      | 53  | 274 AMPL3931712  | Pool=1 |

|                    |      |                  |        |
|--------------------|------|------------------|--------|
| bcrR_KX772240      | 263  | 489 AMPL3931713  | Pool=2 |
| bla1_AF367983      | 57   | 196 AMPL3930712  | Pool=1 |
| bla1_AF367983      | 185  | 399 AMPL3930713  | Pool=2 |
| bla1_AF367983      | 388  | 549 AMPL3930714  | Pool=1 |
| bla1_AF367983      | 515  | 702 AMPL3930715  | Pool=2 |
| bla1_AF367983      | 691  | 807 AMPL3930716  | Pool=1 |
| bla1_AF367983      | 796  | 1016 AMPL3930717 | Pool=2 |
| bla1_AF367983      | 1005 | 1184 AMPL3930718 | Pool=1 |
| bla1_AF367983      | 1173 | 1379 AMPL3930719 | Pool=2 |
| bla1_AF367983      | 1368 | 1580 AMPL3930720 | Pool=1 |
| blaACC_1_NG_048588 | 34   | 136 AMPL3930453  | Pool=2 |
| blaACC_1_NG_048588 | 125  | 351 AMPL3931999  | Pool=1 |
| blaACC_1_NG_048588 | 340  | 568 AMPL3932000  | Pool=2 |
| blaACC_1_NG_048588 | 557  | 730 AMPL3932001  | Pool=1 |
| blaACC_1_NG_048588 | 719  | 941 AMPL3932002  | Pool=2 |
| blaACC_1_NG_048588 | 930  | 1132 AMPL3932003 | Pool=1 |
| blaAIM_1_AM998375  | 425  | 577 AMPL3930721  | Pool=1 |
| blaAIM_1_AM998375  | 591  | 823 AMPL3930722  | Pool=2 |
| blaAIM_1_AM998375  | 832  | 1071 AMPL3930723 | Pool=1 |
| blaAIM_1_AM998375  | 1060 | 1146 AMPL3930724 | Pool=2 |
| blaAIM_1_AM998375  | 1135 | 1308 AMPL3930725 | Pool=1 |
| blaAIM_1_AM998375  | 1297 | 1514 AMPL3930726 | Pool=2 |
| blaAIM_1_AM998375  | 1500 | 1604 AMPL3930727 | Pool=1 |
| blaAIM_1_AM998375  | 1576 | 1802 AMPL3930728 | Pool=2 |
| blaAIM_1_AM998375  | 1791 | 1969 AMPL3930729 | Pool=1 |
| blaAIM_1_AM998375  | 1909 | 2077 AMPL3930730 | Pool=2 |

|                       |      |                  |        |
|-----------------------|------|------------------|--------|
| blaAIM_1_AM998375     | 2094 | 2248 AMPL3930732 | Pool=1 |
| blaBIC_GQ260093       | 23   | 145 AMPL3930740  | Pool=2 |
| blaBIC_GQ260093       | 134  | 299 AMPL3930741  | Pool=1 |
| blaBIC_GQ260093       | 288  | 488 AMPL3930742  | Pool=2 |
| blaBIC_GQ260093       | 477  | 631 AMPL3930743  | Pool=1 |
| blaBIC_GQ260093       | 706  | 822 AMPL3928060  | Pool=2 |
| blaCMY_1_X92508       | 23   | 246 AMPL3931896  | Pool=1 |
| blaCMY_1_X92508       | 203  | 358 AMPL3931897  | Pool=2 |
| blaCMY_1_X92508       | 336  | 442 AMPL3931898  | Pool=1 |
| blaCMY_1_X92508       | 461  | 662 AMPL3931900  | Pool=2 |
| blaCMY_1_X92508       | 650  | 768 AMPL3931901  | Pool=1 |
| blaCMY_1_X92508       | 751  | 926 AMPL3931902  | Pool=2 |
| blaCMY_1_X92508       | 915  | 1122 AMPL3931903 | Pool=1 |
| blaCTX_M_1_6_DQ915955 | 69   | 276 AMPL3930745  | Pool=1 |
| blaCTX_M_1_6_DQ915955 | 265  | 416 AMPL3930746  | Pool=2 |
| blaCTX_M_1_6_DQ915955 | 406  | 628 AMPL3930747  | Pool=1 |
| blaCTX_M_1_6_DQ915955 | 605  | 820 AMPL3930748  | Pool=2 |
| blaCTX_M_9_HM569735   | 62   | 291 AMPL3930749  | Pool=1 |
| blaCTX_M_9_HM569735   | 275  | 479 AMPL3930750  | Pool=2 |
| blaCTX_M_9_HM569735   | 457  | 673 AMPL3930751  | Pool=1 |
| blaCTX_M_9_HM569735   | 663  | 887 AMPL3930752  | Pool=2 |
| blaCTX_M_9_HM569735   | 876  | 1101 AMPL3930753 | Pool=1 |
| blaCTX_M_9_HM569735   | 1090 | 1313 AMPL3930754 | Pool=2 |
| blaCTX_M_9_HM569735   | 1302 | 1424 AMPL3928083 | Pool=1 |
| blaCTX_M_9_HM569735   | 1413 | 1627 AMPL3930755 | Pool=2 |
| blaCTX_M_9_HM569735   | 1621 | 1846 AMPL3930756 | Pool=1 |

|                     |      |                  |        |
|---------------------|------|------------------|--------|
| blaCTX_M_9_HM569735 | 1828 | 1979 AMPL3930757 | Pool=2 |
| blaDHA_1_Y16410     | 33   | 184 AMPL3931906  | Pool=1 |
| blaDHA_1_Y16410     | 173  | 364 AMPL3931907  | Pool=2 |
| blaDHA_1_Y16410     | 319  | 525 AMPL3931908  | Pool=1 |
| blaDHA_1_Y16410     | 514  | 733 AMPL3931909  | Pool=2 |
| blaDHA_1_Y16410     | 721  | 893 AMPL3931910  | Pool=1 |
| blaDHA_1_Y16410     | 882  | 1060 AMPL3931911 | Pool=2 |
| blaGES_1_HQ170511   | 24   | 217 AMPL3931912  | Pool=1 |
| blaGES_1_HQ170511   | 206  | 419 AMPL3931913  | Pool=2 |
| blaGES_1_HQ170511   | 408  | 538 AMPL3931914  | Pool=1 |
| blaGES_1_HQ170511   | 527  | 676 AMPL3931915  | Pool=2 |
| blaGES_1_HQ170511   | 665  | 792 AMPL3930308  | Pool=1 |
| blaGIM_1_JF414726   | 64   | 285 AMPL3931916  | Pool=1 |
| blaGIM_1_JF414726   | 274  | 491 AMPL3931917  | Pool=2 |
| blaGIM_1_JF414726   | 480  | 701 AMPL3931918  | Pool=1 |
| blaIMP_1_DQ522237   | 65   | 285 AMPL3931919  | Pool=2 |
| blaIMP_1_DQ522237   | 275  | 495 AMPL3931920  | Pool=1 |
| blaIMP_1_DQ522237   | 487  | 671 AMPL3931921  | Pool=2 |
| blaKPC_1_AF297554   | 23   | 205 AMPL3931922  | Pool=1 |
| blaKPC_1_AF297554   | 178  | 402 AMPL3931923  | Pool=2 |
| blaKPC_1_AF297554   | 393  | 610 AMPL3931924  | Pool=1 |
| blaKPC_1_AF297554   | 582  | 715 AMPL3931925  | Pool=2 |
| blaKPC_1_AF297554   | 702  | 860 AMPL3931926  | Pool=1 |
| blaL1_3_EF126059    | 48   | 281 AMPL3930758  | Pool=1 |
| blaL1_3_EF126059    | 267  | 470 AMPL3930759  | Pool=2 |
| blaL1_3_EF126059    | 451  | 630 AMPL3930760  | Pool=1 |

|                      |     |                  |        |
|----------------------|-----|------------------|--------|
| blaL1_3_EF126059     | 574 | 744 AMPL3930761  | Pool=2 |
| blaL1_3_EF126059     | 677 | 819 AMPL3930762  | Pool=1 |
| blaOCH_LT840075      | 30  | 253 AMPL3930766  | Pool=2 |
| blaOCH_LT840075      | 242 | 445 AMPL3930767  | Pool=1 |
| blaOCH_LT840075      | 434 | 602 AMPL3930768  | Pool=2 |
| blaOCH_LT840075      | 591 | 751 AMPL3930769  | Pool=1 |
| blaOCH_LT840075      | 740 | 873 AMPL3930770  | Pool=2 |
| blaOCH_LT840075      | 862 | 1085 AMPL3930771 | Pool=1 |
| blaOKP_NG_049360     | 25  | 121 AMPL3928115  | Pool=2 |
| blaOKP_NG_049360     | 107 | 286 AMPL3930772  | Pool=1 |
| blaOKP_NG_049360     | 257 | 455 AMPL3930773  | Pool=2 |
| blaOKP_NG_049360     | 444 | 671 AMPL3930774  | Pool=1 |
| blaOKP_NG_049360     | 636 | 805 AMPL3930775  | Pool=2 |
| blaOXA_10_EU708817   | 31  | 215 AMPL3931386  | Pool=1 |
| blaOXA_10_EU708817   | 204 | 402 AMPL3931387  | Pool=2 |
| blaOXA_10_EU708817   | 391 | 589 AMPL3931388  | Pool=1 |
| blaOXA_10_EU708817   | 578 | 742 AMPL3931389  | Pool=2 |
| blaOXA_23_FJ959346   | 23  | 236 AMPL3930776  | Pool=1 |
| blaOXA_23_FJ959346   | 229 | 371 AMPL3930777  | Pool=2 |
| blaOXA_23_FJ959346   | 360 | 526 AMPL3930778  | Pool=1 |
| blaOXA_23_FJ959346   | 515 | 716 AMPL3930779  | Pool=2 |
| blaOXA_23_FJ959346   | 705 | 920 AMPL3930780  | Pool=1 |
| blaOXA_23_FJ959346   | 909 | 1111 AMPL3930781 | Pool=2 |
| blaOXA_48_2_AY236073 | 29  | 214 AMPL3930782  | Pool=1 |
| blaOXA_48_2_AY236073 | 203 | 428 AMPL3930783  | Pool=2 |
| blaOXA_48_2_AY236073 | 417 | 592 AMPL3930784  | Pool=1 |

|                      |     |                  |        |
|----------------------|-----|------------------|--------|
| blaOXA_48_2_AY236073 | 581 | 751 AMPL3930785  | Pool=2 |
| blaOXA_51_AJ309734   | 61  | 170 AMPL3929334  | Pool=1 |
| blaOXA_51_AJ309734   | 159 | 363 AMPL3931404  | Pool=2 |
| blaOXA_51_AJ309734   | 352 | 559 AMPL3931405  | Pool=1 |
| blaOXA_51_AJ309734   | 548 | 754 AMPL3931406  | Pool=2 |
| blaOXA_58_1_AY665723 | 69  | 196 AMPL3928143  | Pool=1 |
| blaOXA_58_1_AY665723 | 185 | 381 AMPL3930786  | Pool=2 |
| blaOXA_58_1_AY665723 | 370 | 580 AMPL3930787  | Pool=1 |
| blaOXA_58_1_AY665723 | 569 | 779 AMPL3930788  | Pool=2 |
| blaOXY_1_Z30177      | 23  | 195 AMPL3931927  | Pool=1 |
| blaOXY_1_Z30177      | 180 | 276 AMPL3931928  | Pool=2 |
| blaOXY_1_Z30177      | 265 | 477 AMPL3931929  | Pool=1 |
| blaOXY_1_Z30177      | 450 | 625 AMPL3931930  | Pool=2 |
| blaOXY_1_Z30177      | 644 | 818 AMPL3931932  | Pool=1 |
| blaPAO_1_AY083595    | 56  | 275 AMPL3930789  | Pool=1 |
| blaPAO_1_AY083595    | 264 | 454 AMPL3930790  | Pool=2 |
| blaPAO_1_AY083595    | 442 | 631 AMPL3930791  | Pool=1 |
| blaPAO_1_AY083595    | 618 | 780 AMPL3930792  | Pool=2 |
| blaPAO_1_AY083595    | 801 | 1015 AMPL3930794 | Pool=1 |
| blaPAO_1_AY083595    | 859 | 1085 AMPL3930795 | Pool=2 |
| blaPER_1_GU944725    | 44  | 265 AMPL3931933  | Pool=1 |
| blaPER_1_GU944725    | 254 | 479 AMPL3931934  | Pool=2 |
| blaPER_1_GU944725    | 468 | 697 AMPL3931935  | Pool=1 |
| blaPER_1_GU944725    | 686 | 868 AMPL3931936  | Pool=2 |
| blaPER_2_X93314      | 58  | 273 AMPL3931937  | Pool=1 |
| blaPER_2_X93314      | 260 | 484 AMPL3931938  | Pool=2 |

|                   |     |                  |        |
|-------------------|-----|------------------|--------|
| blaPER_2_X93314   | 473 | 700 AMPL3931939  | Pool=1 |
| blaPER_2_X93314   | 689 | 898 AMPL3931940  | Pool=2 |
| blaPSE_1_M69058   | 28  | 211 AMPL3930797  | Pool=1 |
| blaPSE_1_M69058   | 200 | 423 AMPL3930798  | Pool=2 |
| blaPSE_1_M69058   | 412 | 630 AMPL3930799  | Pool=1 |
| blaPSE_1_M69058   | 619 | 753 AMPL3930800  | Pool=2 |
| blaPSE_1_M69058   | 742 | 894 AMPL3930801  | Pool=1 |
| blaPSE_1_M69058   | 883 | 1049 AMPL3930802 | Pool=2 |
| blaROB_1_DQ840517 | 70  | 292 AMPL3931941  | Pool=1 |
| blaROB_1_DQ840517 | 276 | 474 AMPL3931942  | Pool=2 |
| blaROB_1_DQ840517 | 463 | 652 AMPL3931943  | Pool=1 |
| blaROB_1_DQ840517 | 641 | 859 AMPL3931944  | Pool=2 |
| blaSFO_1_AB003148 | 38  | 171 AMPL3931390  | Pool=1 |
| blaSFO_1_AB003148 | 160 | 380 AMPL3931391  | Pool=2 |
| blaSFO_1_AB003148 | 369 | 578 AMPL3931392  | Pool=1 |
| blaSFO_1_AB003148 | 567 | 781 AMPL3931393  | Pool=2 |
| blaSFO_1_AB003148 | 770 | 847 AMPL3929310  | Pool=1 |
| blaSHV_1_AF148850 | 27  | 205 AMPL3930803  | Pool=1 |
| blaSHV_1_AF148850 | 196 | 429 AMPL3930804  | Pool=2 |
| blaSHV_1_AF148850 | 391 | 488 AMPL3930805  | Pool=1 |
| blaSHV_1_AF148850 | 471 | 676 AMPL3930806  | Pool=2 |
| blaSHV_1_AF148850 | 635 | 807 AMPL3930807  | Pool=1 |
| blaSIM_1_JF731030 | 51  | 159 AMPL3931945  | Pool=1 |
| blaSIM_1_JF731030 | 148 | 376 AMPL3931946  | Pool=2 |
| blaSIM_1_JF731030 | 365 | 560 AMPL3931947  | Pool=1 |
| blaSIM_1_JF731030 | 549 | 676 AMPL3931948  | Pool=2 |

|                      |     |                 |        |
|----------------------|-----|-----------------|--------|
| blaSPM_1_AY341249    | 36  | 213 AMPL3931949 | Pool=1 |
| blaSPM_1_AY341249    | 202 | 412 AMPL3931950 | Pool=2 |
| blaSPM_1_AY341249    | 401 | 589 AMPL3931951 | Pool=1 |
| blaTEM_1A_4_HM749966 | 33  | 182 AMPL3930808 | Pool=1 |
| blaTEM_1A_4_HM749966 | 171 | 398 AMPL3930809 | Pool=2 |
| blaTEM_1A_4_HM749966 | 387 | 604 AMPL3930810 | Pool=1 |
| blaTEM_1A_4_HM749966 | 593 | 791 AMPL3930811 | Pool=2 |
| blaTLA_1_AF148067    | 73  | 201 AMPL3931952 | Pool=1 |
| blaTLA_1_AF148067    | 190 | 365 AMPL3931953 | Pool=2 |
| blaTLA_1_AF148067    | 354 | 528 AMPL3931954 | Pool=1 |
| blaTLA_1_AF148067    | 517 | 723 AMPL3931955 | Pool=2 |
| blaTLA_1_AF148067    | 712 | 875 AMPL3931956 | Pool=1 |
| blaVEB_1_HM370393    | 72  | 164 AMPL3930383 | Pool=1 |
| blaVEB_1_HM370393    | 153 | 323 AMPL3931959 | Pool=2 |
| blaVEB_1_HM370393    | 312 | 513 AMPL3931960 | Pool=1 |
| blaVEB_1_HM370393    | 502 | 687 AMPL3931961 | Pool=2 |
| blaVEB_1_HM370393    | 676 | 852 AMPL3931962 | Pool=1 |
| blaVIM_2_KC907378    | 47  | 229 AMPL3931394 | Pool=2 |
| blaVIM_2_KC907378    | 218 | 444 AMPL3931395 | Pool=1 |
| blaVIM_2_KC907378    | 307 | 535 AMPL3931396 | Pool=2 |
| blaVIM_2_KC907378    | 524 | 750 AMPL3931397 | Pool=1 |
| blaZ_32_AP004832     | 68  | 159 AMPL3928189 | Pool=2 |
| blaZ_32_AP004832     | 148 | 314 AMPL3930812 | Pool=1 |
| blaZ_32_AP004832     | 298 | 410 AMPL3930813 | Pool=2 |
| blaZ_32_AP004832     | 531 | 616 AMPL3928196 | Pool=1 |
| carB_HQ616211        | 104 | 291 AMPL3931989 | Pool=2 |



|                  |      |                  |        |
|------------------|------|------------------|--------|
| carB_HQ616211    | 280  | 499 AMPL3931990  | Pool=1 |
| carB_HQ616211    | 488  | 626 AMPL3931991  | Pool=2 |
| carB_HQ616211    | 615  | 826 AMPL3931992  | Pool=1 |
| carB_HQ616211    | 815  | 1005 AMPL3931993 | Pool=2 |
| carB_HQ616211    | 994  | 1186 AMPL3931994 | Pool=1 |
| carB_HQ616211    | 1175 | 1338 AMPL3931995 | Pool=2 |
| carB_HQ616211    | 1327 | 1510 AMPL3931996 | Pool=1 |
| catA1_1_V00622   | 35   | 244 AMPL3931209  | Pool=1 |
| catA1_1_V00622   | 233  | 381 AMPL3931210  | Pool=2 |
| catA1_1_V00622   | 370  | 594 AMPL3931211  | Pool=1 |
| catB3_1_AJ009818 | 44   | 271 AMPL3931212  | Pool=2 |
| catB3_1_AJ009818 | 260  | 465 AMPL3931213  | Pool=1 |
| catB3_1_AJ009818 | 454  | 573 AMPL3928965  | Pool=2 |
| catB8_1_AF227506 | 29   | 209 AMPL3931214  | Pool=1 |
| catB8_1_AF227506 | 198  | 406 AMPL3931215  | Pool=2 |
| catB8_1_AF227506 | 395  | 581 AMPL3931216  | Pool=1 |
| ceoA_U97042      | 32   | 255 AMPL3931716  | Pool=2 |
| ceoA_U97042      | 218  | 445 AMPL3931717  | Pool=1 |
| ceoA_U97042      | 434  | 658 AMPL3931718  | Pool=2 |
| ceoA_U97042      | 647  | 781 AMPL3931719  | Pool=1 |
| ceoA_U97042      | 761  | 998 AMPL3931720  | Pool=2 |
| ceoA_U97042      | 987  | 1198 AMPL3931721 | Pool=1 |
| cepA_1_L13472    | 64   | 255 AMPL3930815  | Pool=2 |
| cepA_1_L13472    | 244  | 463 AMPL3930816  | Pool=1 |
| cepA_1_L13472    | 452  | 661 AMPL3930817  | Pool=2 |
| cepA_1_L13472    | 649  | 833 AMPL3930818  | Pool=1 |

|                |      |                  |        |
|----------------|------|------------------|--------|
| cfr_1_AM408573 | 68   | 173 AMPL3928971  | Pool=1 |
| cfr_1_AM408573 | 162  | 289 AMPL3931217  | Pool=2 |
| cfr_1_AM408573 | 278  | 489 AMPL3931218  | Pool=1 |
| cfr_1_AM408573 | 478  | 599 AMPL3931219  | Pool=2 |
| cfr_1_AM408573 | 576  | 796 AMPL3931220  | Pool=1 |
| cfr_1_AM408573 | 785  | 865 AMPL3928979  | Pool=2 |
| cmeA_AB894099  | 55   | 183 AMPL3931626  | Pool=1 |
| cmeA_AB894099  | 174  | 368 AMPL3931627  | Pool=2 |
| cmeA_AB894099  | 357  | 559 AMPL3931628  | Pool=1 |
| cmeA_AB894099  | 544  | 734 AMPL3931629  | Pool=2 |
| cmeA_AB894099  | 789  | 886 AMPL3931631  | Pool=1 |
| cmeA_AB894099  | 861  | 1069 AMPL3931632 | Pool=2 |
| cmeB_AB894099  | 42   | 173 AMPL3931633  | Pool=1 |
| cmeB_AB894099  | 162  | 374 AMPL3931634  | Pool=2 |
| cmeB_AB894099  | 363  | 547 AMPL3931635  | Pool=1 |
| cmeB_AB894099  | 536  | 700 AMPL3931636  | Pool=2 |
| cmeB_AB894099  | 689  | 909 AMPL3931637  | Pool=1 |
| cmeB_AB894099  | 898  | 1114 AMPL3931638 | Pool=2 |
| cmeB_AB894099  | 1103 | 1291 AMPL3931639 | Pool=1 |
| cmeB_AB894099  | 1280 | 1494 AMPL3931640 | Pool=2 |
| cmeB_AB894099  | 1483 | 1703 AMPL3931641 | Pool=1 |
| cmeB_AB894099  | 1692 | 1887 AMPL3931642 | Pool=2 |
| cmeB_AB894099  | 1876 | 2069 AMPL3931643 | Pool=1 |
| cmeB_AB894099  | 2058 | 2273 AMPL3931644 | Pool=2 |
| cmeB_AB894099  | 2257 | 2399 AMPL3931645 | Pool=1 |
| cmeB_AB894099  | 2388 | 2600 AMPL3931646 | Pool=2 |

|                |      |                  |        |
|----------------|------|------------------|--------|
| cmeB_AB894099  | 2592 | 2807 AMPL3931647 | Pool=1 |
| cmeB_AB894099  | 2796 | 2942 AMPL3931648 | Pool=2 |
| cmeC_AB894099  | 54   | 267 AMPL3931652  | Pool=1 |
| cmeC_AB894099  | 263  | 480 AMPL3931653  | Pool=2 |
| cmeC_AB894099  | 469  | 668 AMPL3931654  | Pool=1 |
| cmeC_AB894099  | 657  | 868 AMPL3931655  | Pool=2 |
| cmeC_AB894099  | 857  | 994 AMPL3931656  | Pool=1 |
| cmeC_AB894099  | 983  | 1202 AMPL3931657 | Pool=2 |
| cmeC_AB894099  | 1191 | 1402 AMPL3931658 | Pool=1 |
| cmIA1_1_M64556 | 36   | 198 AMPL3931221  | Pool=1 |
| cmIA1_1_M64556 | 190  | 419 AMPL3931222  | Pool=2 |
| cmIA1_1_M64556 | 416  | 647 AMPL3931223  | Pool=1 |
| cmIA1_1_M64556 | 646  | 867 AMPL3931224  | Pool=2 |
| cmIA1_1_M64556 | 856  | 1054 AMPL3931225 | Pool=1 |
| cmIA1_1_M64556 | 1024 | 1220 AMPL3931226 | Pool=2 |
| cmr_U44900     | 54   | 196 AMPL3931723  | Pool=1 |
| cmr_U44900     | 185  | 346 AMPL3931724  | Pool=2 |
| cmr_U44900     | 332  | 549 AMPL3931725  | Pool=1 |
| cmr_U44900     | 539  | 754 AMPL3931726  | Pool=2 |
| cmr_U44900     | 743  | 882 AMPL3931727  | Pool=1 |
| cmr_U44900     | 871  | 1033 AMPL3931728 | Pool=2 |
| cmr_U44900     | 1022 | 1199 AMPL3931729 | Pool=1 |
| cmx_1_U85507   | 58   | 257 AMPL3931227  | Pool=1 |
| cmx_1_U85507   | 234  | 320 AMPL3931228  | Pool=2 |
| cmx_1_U85507   | 314  | 514 AMPL3931229  | Pool=1 |
| cmx_1_U85507   | 503  | 738 AMPL3931230  | Pool=2 |

|                 |      |                  |        |
|-----------------|------|------------------|--------|
| cmx_1_U85507    | 678  | 901 AMPL3931231  | Pool=1 |
| cmx_1_U85507    | 890  | 1115 AMPL3931232 | Pool=2 |
| dfrA1_MH574896  | 39   | 201 AMPL3932021  | Pool=1 |
| dfrA1_MH574896  | 190  | 416 AMPL3932022  | Pool=2 |
| dfrA_GU565967   | 30   | 131 AMPL3931536  | Pool=1 |
| dfrA_GU565967   | 120  | 298 AMPL3931537  | Pool=2 |
| dfrA_GU565967   | 287  | 439 AMPL3931538  | Pool=1 |
| dfrK_FN390947   | 39   | 260 AMPL3931539  | Pool=1 |
| dfrK_FN390947   | 249  | 462 AMPL3931540  | Pool=2 |
| dfrA12_JN108892 | 22   | 236 AMPL3931663  | Pool=1 |
| dfrA12_JN108892 | 223  | 442 AMPL3931664  | Pool=2 |
| ereA_2_AF099140 | 67   | 292 AMPL3930830  | Pool=1 |
| ereA_2_AF099140 | 281  | 508 AMPL3930831  | Pool=2 |
| ereA_2_AF099140 | 497  | 641 AMPL3930832  | Pool=1 |
| ereA_2_AF099140 | 630  | 809 AMPL3930833  | Pool=2 |
| ereA_2_AF099140 | 798  | 1023 AMPL3930834 | Pool=1 |
| ereA_2_AF099140 | 1012 | 1156 AMPL3930835 | Pool=2 |
| ereB_2_X03988   | 22   | 226 AMPL3930836  | Pool=1 |
| ereB_2_X03988   | 215  | 425 AMPL3930837  | Pool=2 |
| ereB_2_X03988   | 414  | 603 AMPL3930838  | Pool=1 |
| ereB_2_X03988   | 592  | 814 AMPL3930839  | Pool=2 |
| ereB_2_X03988   | 803  | 1022 AMPL3930840 | Pool=1 |
| ereB_2_X03988   | 1011 | 1190 AMPL3930841 | Pool=2 |
| erm34_AY234334  | 54   | 270 AMPL3931407  | Pool=1 |
| erm34_AY234334  | 259  | 471 AMPL3931408  | Pool=2 |
| erm34_AY234334  | 460  | 637 AMPL3931409  | Pool=1 |

|                |     |                  |        |
|----------------|-----|------------------|--------|
| erm34_AY234334 | 626 | 798 AMPL3931410  | Pool=2 |
| erm35_AF319779 | 54  | 217 AMPL3931411  | Pool=1 |
| erm35_AF319779 | 206 | 421 AMPL3931412  | Pool=2 |
| erm35_AF319779 | 411 | 614 AMPL3931413  | Pool=1 |
| erm35_AF319779 | 531 | 753 AMPL3931414  | Pool=2 |
| erm36_AF462611 | 60  | 221 AMPL3931415  | Pool=1 |
| erm36_AF462611 | 196 | 419 AMPL3931416  | Pool=2 |
| erm36_AF462611 | 375 | 494 AMPL3931417  | Pool=1 |
| erm36_AF462611 | 483 | 642 AMPL3931418  | Pool=2 |
| erm36_AF462611 | 628 | 786 AMPL3931419  | Pool=1 |
| erm36_AF462611 | 775 | 963 AMPL3931420  | Pool=2 |
| erm36_AF462611 | 952 | 1118 AMPL3931421 | Pool=1 |
| ermA_1_X03216  | 34  | 161 AMPL3930842  | Pool=1 |
| ermA_1_X03216  | 150 | 372 AMPL3930843  | Pool=2 |
| ermA_1_X03216  | 361 | 437 AMPL3928258  | Pool=1 |
| ermA_1_X03216  | 426 | 642 AMPL3930844  | Pool=2 |
| ermB_18_X66468 | 29  | 139 AMPL3928264  | Pool=1 |
| ermB_18_X66468 | 128 | 316 AMPL3930847  | Pool=2 |
| ermB_18_X66468 | 305 | 500 AMPL3930848  | Pool=1 |
| ermB_18_X66468 | 489 | 692 AMPL3930849  | Pool=2 |
| ermC_1_V01278  | 31  | 207 AMPL3930850  | Pool=1 |
| ermC_1_V01278  | 196 | 408 AMPL3930851  | Pool=2 |
| ermC_1_V01278  | 397 | 497 AMPL3930852  | Pool=1 |
| ermC_1_V01278  | 494 | 681 AMPL3930853  | Pool=2 |
| ermD_1_M29832  | 69  | 250 AMPL3930854  | Pool=1 |
| ermD_1_M29832  | 239 | 380 AMPL3930855  | Pool=2 |

|               |     |                  |        |
|---------------|-----|------------------|--------|
| ermD_1_M29832 | 388 | 601 AMPL3930856  | Pool=1 |
| ermD_1_M29832 | 623 | 795 AMPL3930858  | Pool=2 |
| ermE_1_X51891 | 20  | 250 AMPL3930861  | Pool=1 |
| ermE_1_X51891 | 236 | 324 AMPL3928291  | Pool=2 |
| ermE_1_X51891 | 312 | 546 AMPL3930862  | Pool=1 |
| ermE_1_X51891 | 538 | 714 AMPL3930863  | Pool=2 |
| ermE_1_X51891 | 700 | 850 AMPL3930864  | Pool=1 |
| ermE_1_X51891 | 839 | 1025 AMPL3930865 | Pool=2 |
| ermF_2_M17124 | 54  | 262 AMPL3930985  | Pool=1 |
| ermF_2_M17124 | 251 | 465 AMPL3930986  | Pool=2 |
| ermF_2_M17124 | 454 | 673 AMPL3930987  | Pool=1 |
| ermF_2_M17124 | 665 | 753 AMPL3928542  | Pool=2 |
| ermG_1_M15332 | 117 | 296 AMPL3930867  | Pool=1 |
| ermG_1_M15332 | 285 | 483 AMPL3930868  | Pool=2 |
| ermG_1_M15332 | 472 | 670 AMPL3930869  | Pool=1 |
| ermK_M77505   | 69  | 179 AMPL3929320  | Pool=1 |
| ermK_M77505   | 168 | 380 AMPL3931398  | Pool=2 |
| ermK_M77505   | 373 | 596 AMPL3931399  | Pool=1 |
| ermK_M77505   | 619 | 813 AMPL3931401  | Pool=2 |
| ermT_1_M64090 | 50  | 205 AMPL3930871  | Pool=1 |
| ermT_1_M64090 | 195 | 376 AMPL3930872  | Pool=2 |
| ermT_1_M64090 | 365 | 531 AMPL3930873  | Pool=1 |
| ermT_1_M64090 | 520 | 672 AMPL3930874  | Pool=2 |
| ermX_1_M36726 | 44  | 207 AMPL3930875  | Pool=1 |
| ermX_1_M36726 | 196 | 369 AMPL3930876  | Pool=2 |
| ermX_1_M36726 | 348 | 550 AMPL3930877  | Pool=1 |

|                 |      |                  |        |
|-----------------|------|------------------|--------|
| ermX_1_M36726   | 468  | 670 AMPL3930878  | Pool=2 |
| ermX_1_M36726   | 661  | 790 AMPL3928327  | Pool=1 |
| ermY_1_AB014481 | 125  | 317 AMPL3930879  | Pool=1 |
| ermY_1_AB014481 | 300  | 469 AMPL3930880  | Pool=2 |
| ermY_1_AB014481 | 453  | 662 AMPL3930881  | Pool=1 |
| fabK_FJ390165   | 27   | 179 AMPL3931730  | Pool=1 |
| fabK_FJ390165   | 168  | 391 AMPL3931731  | Pool=2 |
| fexA_1_AJ549214 | 73   | 155 AMPL3931233  | Pool=1 |
| fexA_1_AJ549214 | 144  | 366 AMPL3931234  | Pool=2 |
| fexA_1_AJ549214 | 355  | 550 AMPL3931235  | Pool=1 |
| fexA_1_AJ549214 | 539  | 764 AMPL3931236  | Pool=2 |
| fexA_1_AJ549214 | 753  | 974 AMPL3931237  | Pool=1 |
| fexA_1_AJ549214 | 963  | 1183 AMPL3931238 | Pool=2 |
| fexA_1_AJ549214 | 1172 | 1377 AMPL3931239 | Pool=1 |
| floR_1_AF071555 | 66   | 194 AMPL3931241  | Pool=2 |
| floR_1_AF071555 | 183  | 410 AMPL3931242  | Pool=1 |
| floR_1_AF071555 | 332  | 544 AMPL3931243  | Pool=2 |
| floR_1_AF071555 | 533  | 638 AMPL3931244  | Pool=1 |
| floR_1_AF071555 | 627  | 797 AMPL3931245  | Pool=2 |
| floR_1_AF071555 | 786  | 956 AMPL3931246  | Pool=1 |
| floR_1_AF071555 | 945  | 1054 AMPL3931247 | Pool=2 |
| floR_1_AF071555 | 1043 | 1195 AMPL3931248 | Pool=1 |
| folA_EU871432   | 61   | 271 AMPL3931665  | Pool=1 |
| folA_EU871432   | 260  | 451 AMPL3931666  | Pool=2 |
| fosA3_KX245440  | 23   | 179 AMPL3931541  | Pool=1 |
| fosA3_KX245440  | 164  | 351 AMPL3931542  | Pool=2 |

|                  |      |                  |        |
|------------------|------|------------------|--------|
| fosA_M85195      | 22   | 225 AMPL3931544  | Pool=1 |
| fosA_M85195      | 212  | 398 AMPL3931545  | Pool=2 |
| fosB_X89875      | 103  | 242 AMPL3931546  | Pool=1 |
| fosB_X89875      | 232  | 374 AMPL3931547  | Pool=2 |
| fosX_CC_KC876749 | 33   | 153 AMPL3931551  | Pool=1 |
| fosX_CC_KC876749 | 142  | 346 AMPL3931552  | Pool=2 |
| fosX_CC_KC876749 | 321  | 395 AMPL3931553  | Pool=1 |
| fosX_NG_047899   | 57   | 281 AMPL3931550  | Pool=2 |
| gyrA_MG995190    | 59   | 268 AMPL3931576  | Pool=1 |
| gyrA_MG995190    | 254  | 444 AMPL3931577  | Pool=2 |
| gyrA_MG995190    | 433  | 574 AMPL3931578  | Pool=1 |
| gyrA_MG995190    | 565  | 763 AMPL3931579  | Pool=2 |
| gyrA_MG995190    | 740  | 930 AMPL3931580  | Pool=1 |
| gyrA_MG995190    | 919  | 1102 AMPL3931581 | Pool=2 |
| gyrA_MG995190    | 1093 | 1300 AMPL3931582 | Pool=1 |
| gyrA_MG995190    | 1289 | 1389 AMPL3931583 | Pool=2 |
| gyrA_MG995190    | 1377 | 1584 AMPL3931584 | Pool=1 |
| gyrA_MG995190    | 1573 | 1703 AMPL3929684 | Pool=2 |
| gyrA_MG995190    | 1700 | 1915 AMPL3931585 | Pool=1 |
| gyrA_MG995190    | 1904 | 2106 AMPL3931586 | Pool=2 |
| gyrA_MG995190    | 2126 | 2293 AMPL3931588 | Pool=1 |
| gyrA_MG995190    | 2267 | 2469 AMPL3931589 | Pool=2 |
| imiR_KR057494    | 25   | 139 AMPL3931732  | Pool=1 |
| imiR_KR057494    | 128  | 329 AMPL3931733  | Pool=2 |
| imiR_KR057494    | 318  | 548 AMPL3931734  | Pool=1 |
| imiR_KR057494    | 537  | 676 AMPL3931735  | Pool=2 |



|                   |      |                  |        |
|-------------------|------|------------------|--------|
| imiR_KR057494     | 665  | 837 AMPL3931736  | Pool=1 |
| intl1_NZ_CP039294 | 53   | 217 AMPL3932033  | Pool=1 |
| intl1_NZ_CP039294 | 199  | 300 AMPL3930518  | Pool=2 |
| intl1_NZ_CP039294 | 275  | 468 AMPL3932034  | Pool=1 |
| intl1_NZ_CP039294 | 458  | 686 AMPL3932035  | Pool=2 |
| intl1_NZ_CP039294 | 551  | 779 AMPL3932036  | Pool=1 |
| intl1_NZ_CP039294 | 768  | 965 AMPL3932037  | Pool=2 |
| lmrA_1_X59926     | 34   | 211 AMPL3930886  | Pool=1 |
| lmrA_1_X59926     | 201  | 351 AMPL3930887  | Pool=2 |
| lmrA_1_X59926     | 442  | 552 AMPL3930889  | Pool=1 |
| lmrA_1_X59926     | 542  | 688 AMPL3930890  | Pool=2 |
| lmrA_1_X59926     | 617  | 826 AMPL3930891  | Pool=1 |
| lmrA_1_X59926     | 908  | 1143 AMPL3930893 | Pool=2 |
| lmrA_1_X59926     | 1132 | 1338 AMPL3930894 | Pool=1 |
| lnuA_1_M14039     | 86   | 243 AMPL3930898  | Pool=1 |
| lnuA_1_M14039     | 232  | 424 AMPL3930899  | Pool=2 |
| lnuB_1_AJ238249   | 51   | 213 AMPL3930902  | Pool=1 |
| lnuB_1_AJ238249   | 202  | 344 AMPL3930903  | Pool=2 |
| lnuB_1_AJ238249   | 333  | 543 AMPL3930904  | Pool=1 |
| lnuB_1_AJ238249   | 532  | 740 AMPL3930905  | Pool=2 |
| lnuC_1_AY928180   | 43   | 259 AMPL3930906  | Pool=1 |
| lnuC_1_AY928180   | 248  | 425 AMPL3930907  | Pool=2 |
| lsaB_NG_047933    | 54   | 121 AMPL3929441  | Pool=1 |
| lsaB_NG_047933    | 108  | 301 AMPL3931455  | Pool=2 |
| lsaB_NG_047933    | 290  | 503 AMPL3931456  | Pool=1 |
| lsaB_NG_047933    | 491  | 709 AMPL3931457  | Pool=2 |

|                     |      |                  |        |
|---------------------|------|------------------|--------|
| IsaB_NG_047933      | 698  | 914 AMPL3931458  | Pool=1 |
| IsaB_NG_047933      | 903  | 1061 AMPL3931459 | Pool=2 |
| IsaB_NG_047933      | 1050 | 1222 AMPL3931460 | Pool=1 |
| IsaB_NG_047933      | 1211 | 1409 AMPL3931461 | Pool=2 |
| IsaE_JX560992       | 48   | 200 AMPL3931462  | Pool=1 |
| IsaE_JX560992       | 189  | 407 AMPL3931463  | Pool=2 |
| IsaE_JX560992       | 396  | 616 AMPL3931464  | Pool=1 |
| IsaE_JX560992       | 605  | 824 AMPL3931465  | Pool=2 |
| IsaE_JX560992       | 813  | 1028 AMPL3931466 | Pool=1 |
| IsaE_JX560992       | 1018 | 1233 AMPL3931467 | Pool=2 |
| IsaE_JX560992       | 1110 | 1285 AMPL3931468 | Pool=1 |
| mcr_1_11_1_KY853650 | 23   | 221 AMPL3931133  | Pool=1 |
| mcr_1_11_1_KY853650 | 210  | 375 AMPL3931134  | Pool=2 |
| mcr_1_11_1_KY853650 | 364  | 574 AMPL3931135  | Pool=1 |
| mcr_1_11_1_KY853650 | 563  | 783 AMPL3931136  | Pool=2 |
| mcr_1_11_1_KY853650 | 772  | 926 AMPL3931137  | Pool=1 |
| mcr_1_11_1_KY853650 | 915  | 1141 AMPL3931138 | Pool=2 |
| mcr_1_11_1_KY853650 | 1130 | 1357 AMPL3931139 | Pool=1 |
| mcr_1_11_1_KY853650 | 1346 | 1561 AMPL3931140 | Pool=2 |
| mcr_2_1_1_LT598652  | 26   | 171 AMPL3931141  | Pool=1 |
| mcr_2_1_1_LT598652  | 160  | 369 AMPL3931142  | Pool=2 |
| mcr_2_1_1_LT598652  | 361  | 579 AMPL3931143  | Pool=1 |
| mcr_2_1_1_LT598652  | 568  | 789 AMPL3931144  | Pool=2 |
| mcr_2_1_1_LT598652  | 769  | 953 AMPL3931145  | Pool=1 |
| mcr_2_1_1_LT598652  | 942  | 1129 AMPL3931146 | Pool=2 |
| mcr_2_1_1_LT598652  | 1118 | 1337 AMPL3931147 | Pool=1 |

|                     |      |                  |        |
|---------------------|------|------------------|--------|
| mcr_2_1_1_LT598652  | 1326 | 1549 AMPL3931148 | Pool=2 |
| mcr_3_17_1_MH332767 | 64   | 241 AMPL3931157  | Pool=1 |
| mcr_3_17_1_MH332767 | 230  | 451 AMPL3931158  | Pool=2 |
| mcr_3_17_1_MH332767 | 440  | 602 AMPL3931159  | Pool=1 |
| mcr_3_17_1_MH332767 | 595  | 805 AMPL3931160  | Pool=2 |
| mcr_3_17_1_MH332767 | 794  | 1015 AMPL3931161 | Pool=1 |
| mcr_3_17_1_MH332767 | 1004 | 1226 AMPL3931162 | Pool=2 |
| mcr_3_17_1_MH332767 | 1215 | 1429 AMPL3931163 | Pool=1 |
| mcr_3_17_1_MH332767 | 1419 | 1560 AMPL3931164 | Pool=2 |
| mcr_3_1_1_KY924928  | 50   | 220 AMPL3931149  | Pool=1 |
| mcr_3_1_1_KY924928  | 205  | 417 AMPL3931150  | Pool=2 |
| mcr_3_1_1_KY924928  | 406  | 598 AMPL3931151  | Pool=1 |
| mcr_3_1_1_KY924928  | 587  | 807 AMPL3931152  | Pool=2 |
| mcr_3_1_1_KY924928  | 796  | 1012 AMPL3931153 | Pool=1 |
| mcr_3_1_1_KY924928  | 1001 | 1223 AMPL3931154 | Pool=2 |
| mcr_3_1_1_KY924928  | 1212 | 1367 AMPL3931155 | Pool=1 |
| mcr_3_1_1_KY924928  | 1356 | 1560 AMPL3931156 | Pool=2 |
| mcr_4_1_1_MF543359  | 42   | 226 AMPL3931165  | Pool=1 |
| mcr_4_1_1_MF543359  | 215  | 405 AMPL3931166  | Pool=2 |
| mcr_4_1_1_MF543359  | 394  | 584 AMPL3931167  | Pool=1 |
| mcr_4_1_1_MF543359  | 573  | 794 AMPL3931168  | Pool=2 |
| mcr_4_1_1_MF543359  | 783  | 998 AMPL3931169  | Pool=1 |
| mcr_4_1_1_MF543359  | 987  | 1207 AMPL3931170 | Pool=2 |
| mcr_4_1_1_MF543359  | 1196 | 1350 AMPL3931171 | Pool=1 |
| mcr_4_1_1_MF543359  | 1339 | 1556 AMPL3931172 | Pool=2 |
| mcr_5_1_1_KY807921  | 63   | 280 AMPL3931173  | Pool=1 |

|                    |      |                  |        |
|--------------------|------|------------------|--------|
| mcr_5_1_1_KY807921 | 269  | 426 AMPL3931174  | Pool=2 |
| mcr_5_1_1_KY807921 | 415  | 614 AMPL3931175  | Pool=1 |
| mcr_5_1_1_KY807921 | 603  | 814 AMPL3931176  | Pool=2 |
| mcr_5_1_1_KY807921 | 845  | 980 AMPL3931178  | Pool=1 |
| mcr_5_1_1_KY807921 | 969  | 1106 AMPL3931179 | Pool=2 |
| mcr_5_1_1_KY807921 | 1095 | 1285 AMPL3931180 | Pool=1 |
| mcr_5_1_1_KY807921 | 1274 | 1476 AMPL3931181 | Pool=2 |
| mcr_5_1_1_KY807921 | 1465 | 1609 AMPL3931182 | Pool=1 |
| mcr_6_1_1_MF176240 | 22   | 211 AMPL3931183  | Pool=1 |
| mcr_6_1_1_MF176240 | 200  | 424 AMPL3931184  | Pool=2 |
| mcr_6_1_1_MF176240 | 413  | 639 AMPL3931185  | Pool=1 |
| mcr_6_1_1_MF176240 | 628  | 851 AMPL3931186  | Pool=2 |
| mcr_6_1_1_MF176240 | 837  | 1019 AMPL3931187 | Pool=1 |
| mcr_6_1_1_MF176240 | 1008 | 1149 AMPL3931188 | Pool=2 |
| mcr_6_1_1_MF176240 | 1138 | 1338 AMPL3931189 | Pool=1 |
| mcr_6_1_1_MF176240 | 1327 | 1550 AMPL3931190 | Pool=2 |
| mcr_7_1_1_MG267386 | 55   | 283 AMPL3931191  | Pool=1 |
| mcr_7_1_1_MG267386 | 272  | 498 AMPL3931192  | Pool=2 |
| mcr_7_1_1_MG267386 | 437  | 568 AMPL3931193  | Pool=1 |
| mcr_7_1_1_MG267386 | 697  | 783 AMPL3928928  | Pool=2 |
| mcr_7_1_1_MG267386 | 759  | 931 AMPL3931195  | Pool=1 |
| mcr_7_1_1_MG267386 | 883  | 1051 AMPL3931196 | Pool=2 |
| mcr_7_1_1_MG267386 | 1040 | 1256 AMPL3931197 | Pool=1 |
| mcr_7_1_1_MG267386 | 1245 | 1324 AMPL3931198 | Pool=2 |
| mcr_7_1_1_MG267386 | 1307 | 1501 AMPL3931199 | Pool=1 |
| mcr_8_1_MG736312   | 42   | 220 AMPL3931201  | Pool=1 |

|                  |      |                  |        |
|------------------|------|------------------|--------|
| mcr_8_1_MG736312 | 209  | 420 AMPL3931202  | Pool=2 |
| mcr_8_1_MG736312 | 409  | 627 AMPL3931203  | Pool=1 |
| mcr_8_1_MG736312 | 616  | 842 AMPL3931204  | Pool=2 |
| mcr_8_1_MG736312 | 831  | 1046 AMPL3931205 | Pool=1 |
| mcr_8_1_MG736312 | 1028 | 1231 AMPL3931206 | Pool=2 |
| mcr_8_1_MG736312 | 1220 | 1435 AMPL3931207 | Pool=1 |
| mcr_8_1_MG736312 | 1424 | 1633 AMPL3931208 | Pool=2 |
| mdet11_AJ012115  | 49   | 146 AMPL3929969  | Pool=1 |
| mdet11_AJ012115  | 135  | 307 AMPL3931737  | Pool=2 |
| mdet11_AJ012115  | 296  | 372 AMPL3931738  | Pool=1 |
| mdet11_AJ012115  | 361  | 579 AMPL3931739  | Pool=2 |
| mdet11_AJ012115  | 568  | 766 AMPL3931740  | Pool=1 |
| mdet11_AJ012115  | 755  | 959 AMPL3931741  | Pool=2 |
| mdet11_AJ012115  | 948  | 1128 AMPL3931742 | Pool=1 |
| mdtE_NC_000913   | 42   | 263 AMPL3931743  | Pool=1 |
| mdtE_NC_000913   | 254  | 477 AMPL3931744  | Pool=2 |
| mdtE_NC_000913   | 461  | 685 AMPL3931745  | Pool=1 |
| mdtE_NC_000913   | 674  | 893 AMPL3931746  | Pool=2 |
| mdtE_NC_000913   | 882  | 1111 AMPL3931747 | Pool=1 |
| mecA_10_AB512767 | 60   | 221 AMPL3930819  | Pool=1 |
| mecA_10_AB512767 | 209  | 354 AMPL3930820  | Pool=2 |
| mecA_10_AB512767 | 343  | 554 AMPL3930821  | Pool=1 |
| mecA_10_AB512767 | 543  | 759 AMPL3930822  | Pool=2 |
| mecA_10_AB512767 | 748  | 860 AMPL3930823  | Pool=1 |
| mecA_10_AB512767 | 849  | 1064 AMPL3930824 | Pool=2 |
| mecA_10_AB512767 | 1053 | 1269 AMPL3930825 | Pool=1 |

|                  |      |                  |        |
|------------------|------|------------------|--------|
| mecA_10_AB512767 | 1257 | 1453 AMPL3930826 | Pool=2 |
| mecA_10_AB512767 | 1442 | 1610 AMPL3930827 | Pool=1 |
| mecA_10_AB512767 | 1599 | 1812 AMPL3930828 | Pool=2 |
| mecA_10_AB512767 | 1801 | 1953 AMPL3930829 | Pool=1 |
| mefA_3_AF227521  | 66   | 159 AMPL3930908  | Pool=1 |
| mefA_3_AF227521  | 148  | 369 AMPL3930909  | Pool=2 |
| mefA_3_AF227521  | 358  | 551 AMPL3930910  | Pool=1 |
| mefA_3_AF227521  | 540  | 755 AMPL3930911  | Pool=2 |
| mefA_3_AF227521  | 744  | 962 AMPL3930912  | Pool=1 |
| mefA_3_AF227521  | 951  | 1151 AMPL3930913 | Pool=2 |
| mefB_1_FJ196385  | 59   | 168 AMPL3930914  | Pool=1 |
| mefB_1_FJ196385  | 157  | 385 AMPL3930915  | Pool=2 |
| mefB_1_FJ196385  | 372  | 572 AMPL3930916  | Pool=1 |
| mefB_1_FJ196385  | 561  | 785 AMPL3930917  | Pool=2 |
| mefB_1_FJ196385  | 774  | 993 AMPL3930918  | Pool=1 |
| mefB_1_FJ196385  | 982  | 1165 AMPL3930919 | Pool=2 |
| mel_KU984333     | 38   | 198 AMPL3931569  | Pool=1 |
| mel_KU984333     | 187  | 410 AMPL3931570  | Pool=2 |
| mel_KU984333     | 399  | 590 AMPL3931571  | Pool=1 |
| mel_KU984333     | 579  | 799 AMPL3931572  | Pool=2 |
| mel_KU984333     | 788  | 1007 AMPL3931573 | Pool=1 |
| mel_KU984333     | 996  | 1221 AMPL3931574 | Pool=2 |
| mel_KU984333     | 1210 | 1425 AMPL3931575 | Pool=1 |
| mepA_AY661734    | 52   | 173 AMPL3931748  | Pool=1 |
| mepA_AY661734    | 162  | 335 AMPL3931749  | Pool=2 |
| mepA_AY661734    | 324  | 501 AMPL3931750  | Pool=1 |

|                 |      |                  |        |
|-----------------|------|------------------|--------|
| mepA_AY661734   | 488  | 710 AMPL3931751  | Pool=2 |
| mepA_AY661734   | 696  | 908 AMPL3931752  | Pool=1 |
| mepA_AY661734   | 897  | 1105 AMPL3931753 | Pool=2 |
| mepA_AY661734   | 1093 | 1305 AMPL3931754 | Pool=1 |
| mphA_1_D16251   | 53   | 182 AMPL3928402  | Pool=1 |
| mphA_1_D16251   | 171  | 325 AMPL3930920  | Pool=2 |
| mphA_1_D16251   | 314  | 538 AMPL3930921  | Pool=1 |
| mphA_1_D16251   | 468  | 679 AMPL3930922  | Pool=2 |
| mphA_1_D16251   | 635  | 861 AMPL3930923  | Pool=1 |
| mphB_1_D85892   | 69   | 220 AMPL3930924  | Pool=2 |
| mphB_1_D85892   | 209  | 431 AMPL3930925  | Pool=1 |
| mphB_1_D85892   | 420  | 627 AMPL3930926  | Pool=2 |
| mphB_1_D85892   | 616  | 839 AMPL3930927  | Pool=1 |
| mphC_1_AB013298 | 60   | 157 AMPL3930928  | Pool=2 |
| mphC_1_AB013298 | 146  | 365 AMPL3930929  | Pool=1 |
| mphC_1_AB013298 | 354  | 544 AMPL3930930  | Pool=2 |
| mphC_1_AB013298 | 533  | 628 AMPL3928424  | Pool=1 |
| mphC_1_AB013298 | 617  | 830 AMPL3930931  | Pool=2 |
| msrA_1_X52085   | 67   | 196 AMPL3930932  | Pool=1 |
| msrA_1_X52085   | 185  | 292 AMPL3930933  | Pool=2 |
| msrA_1_X52085   | 281  | 502 AMPL3930934  | Pool=1 |
| msrA_1_X52085   | 491  | 714 AMPL3930935  | Pool=2 |
| msrA_1_X52085   | 703  | 927 AMPL3930936  | Pool=1 |
| msrA_1_X52085   | 920  | 1070 AMPL3930937 | Pool=2 |
| msrA_1_X52085   | 1059 | 1275 AMPL3930938 | Pool=1 |
| msrA_1_X52085   | 1264 | 1423 AMPL3930939 | Pool=2 |

|                  |      |                  |        |
|------------------|------|------------------|--------|
| mstrC_1_AY004350 | 50   | 193 AMPL3930940  | Pool=1 |
| mstrC_1_AY004350 | 182  | 403 AMPL3930941  | Pool=2 |
| mstrC_1_AY004350 | 392  | 594 AMPL3930942  | Pool=1 |
| mstrC_1_AY004350 | 583  | 803 AMPL3930943  | Pool=2 |
| mstrC_1_AY004350 | 792  | 1004 AMPL3930944 | Pool=1 |
| mstrC_1_AY004350 | 993  | 1211 AMPL3930945 | Pool=2 |
| mstrC_1_AY004350 | 1200 | 1411 AMPL3930946 | Pool=1 |
| mstrD_2_AF274302 | 42   | 170 AMPL3930947  | Pool=1 |
| mstrD_2_AF274302 | 159  | 382 AMPL3930948  | Pool=2 |
| mstrD_2_AF274302 | 371  | 591 AMPL3930949  | Pool=1 |
| mstrD_2_AF274302 | 580  | 804 AMPL3930950  | Pool=2 |
| mstrD_2_AF274302 | 793  | 1015 AMPL3930951 | Pool=1 |
| mstrD_2_AF274302 | 1004 | 1225 AMPL3930952 | Pool=2 |
| mstrD_2_AF274302 | 1214 | 1394 AMPL3930953 | Pool=1 |
| mtrC_HQ712081    | 30   | 246 AMPL3931755  | Pool=1 |
| mtrC_HQ712081    | 232  | 460 AMPL3931756  | Pool=2 |
| mtrC_HQ712081    | 449  | 670 AMPL3931757  | Pool=1 |
| mtrC_HQ712081    | 658  | 877 AMPL3931758  | Pool=2 |
| mtrC_HQ712081    | 867  | 1087 AMPL3931759 | Pool=1 |
| mtrC_HQ712081    | 1076 | 1266 AMPL3931760 | Pool=2 |
| mtrD_HQ706341    | 18   | 233 AMPL3931761  | Pool=1 |
| nimE_NG_048015   | 46   | 274 AMPL3931763  | Pool=2 |
| nimE_NG_048015   | 263  | 479 AMPL3931764  | Pool=1 |
| nisB_X68307      | 35   | 169 AMPL3931765  | Pool=2 |
| nisB_X68307      | 157  | 346 AMPL3931766  | Pool=1 |
| nisB_X68307      | 335  | 445 AMPL3931767  | Pool=2 |



|                 |      |                  |        |
|-----------------|------|------------------|--------|
| nisB_X68307     | 404  | 616 AMPL3931768  | Pool=1 |
| nisB_X68307     | 605  | 809 AMPL3931769  | Pool=2 |
| nisB_X68307     | 717  | 932 AMPL3931770  | Pool=1 |
| nisB_X68307     | 877  | 1068 AMPL3931771 | Pool=2 |
| nisB_X68307     | 985  | 1175 AMPL3931772 | Pool=1 |
| nisB_X68307     | 1164 | 1389 AMPL3931773 | Pool=2 |
| nisB_X68307     | 1378 | 1569 AMPL3931774 | Pool=1 |
| nisB_X68307     | 1558 | 1744 AMPL3931775 | Pool=2 |
| nisB_X68307     | 1651 | 1829 AMPL3931776 | Pool=1 |
| nisB_X68307     | 1797 | 1955 AMPL3931777 | Pool=2 |
| nisB_X68307     | 1927 | 2118 AMPL3931778 | Pool=1 |
| nisB_X68307     | 2107 | 2327 AMPL3931779 | Pool=2 |
| nisB_X68307     | 2316 | 2479 AMPL3931780 | Pool=1 |
| nisB_X68307     | 2443 | 2575 AMPL3931781 | Pool=2 |
| nisB_X68307     | 2552 | 2731 AMPL3931782 | Pool=1 |
| nisB_X68307     | 2652 | 2867 AMPL3931783 | Pool=2 |
| nisB_X68307     | 2856 | 2931 AMPL3931784 | Pool=1 |
| npmA_1_AB261016 | 29   | 197 AMPL3931015  | Pool=1 |
| npmA_1_AB261016 | 186  | 388 AMPL3931016  | Pool=2 |
| npmA_1_AB261016 | 377  | 592 AMPL3931017  | Pool=1 |
| oleC_1_L06249   | 30   | 183 AMPL3930954  | Pool=2 |
| oleC_1_L06249   | 151  | 274 AMPL3930955  | Pool=1 |
| oleC_1_L06249   | 263  | 501 AMPL3930956  | Pool=2 |
| oleC_1_L06249   | 470  | 593 AMPL3930957  | Pool=1 |
| oleC_1_L06249   | 575  | 801 AMPL3930958  | Pool=2 |
| oleC_1_L06249   | 777  | 959 AMPL3930959  | Pool=1 |

|                   |      |                  |        |
|-------------------|------|------------------|--------|
| optrA_NG_048023_1 | 64   | 282 AMPL3931966  | Pool=1 |
| optrA_NG_048023_1 | 269  | 479 AMPL3931967  | Pool=2 |
| optrA_NG_048023_1 | 468  | 593 AMPL3931968  | Pool=1 |
| optrA_NG_048023_1 | 582  | 778 AMPL3931969  | Pool=2 |
| optrA_NG_048023_1 | 758  | 823 AMPL3931970  | Pool=1 |
| optrA_NG_048023_1 | 994  | 1162 AMPL3931972 | Pool=2 |
| oqxA_1_EU370913   | 66   | 283 AMPL3931060  | Pool=1 |
| oqxA_1_EU370913   | 272  | 389 AMPL3931061  | Pool=2 |
| oqxA_1_EU370913   | 403  | 632 AMPL3931063  | Pool=1 |
| oqxA_1_EU370913   | 529  | 666 AMPL3931064  | Pool=2 |
| oqxA_1_EU370913   | 823  | 980 AMPL3931066  | Pool=1 |
| oqxA_1_EU370913   | 969  | 1121 AMPL3931067 | Pool=2 |
| oqxB_1_EU370913   | 40   | 231 AMPL3931068  | Pool=1 |
| oqxB_1_EU370913   | 227  | 446 AMPL3931069  | Pool=2 |
| oqxB_1_EU370913   | 435  | 571 AMPL3931070  | Pool=1 |
| oqxB_1_EU370913   | 557  | 725 AMPL3931071  | Pool=2 |
| oqxB_1_EU370913   | 714  | 899 AMPL3931072  | Pool=1 |
| oqxB_1_EU370913   | 891  | 1100 AMPL3931073 | Pool=2 |
| oqxB_1_EU370913   | 1085 | 1249 AMPL3931074 | Pool=1 |
| oqxB_1_EU370913   | 1223 | 1441 AMPL3931075 | Pool=2 |
| oqxB_1_EU370913   | 1417 | 1601 AMPL3931076 | Pool=1 |
| oqxB_1_EU370913   | 1587 | 1799 AMPL3931077 | Pool=2 |
| oqxB_1_EU370913   | 1730 | 1948 AMPL3931078 | Pool=1 |
| oqxB_1_EU370913   | 1910 | 2022 AMPL3931079 | Pool=2 |
| oqxB_1_EU370913   | 1988 | 2152 AMPL3931080 | Pool=1 |
| oqxB_1_EU370913   | 2073 | 2265 AMPL3931081 | Pool=2 |

|                 |      |                  |        |
|-----------------|------|------------------|--------|
| oqxB_1_EU370913 | 2253 | 2388 AMPL3931082 | Pool=1 |
| oqxB_1_EU370913 | 2377 | 2579 AMPL3931083 | Pool=2 |
| oqxB_1_EU370913 | 2568 | 2780 AMPL3931084 | Pool=1 |
| oqxB_1_EU370913 | 2747 | 2941 AMPL3931085 | Pool=2 |
| oqxB_1_EU370913 | 2862 | 3085 AMPL3931086 | Pool=1 |
| pbp1a_AF446215  | 31   | 139 AMPL3931854  | Pool=1 |
| pbp1a_AF446215  | 128  | 352 AMPL3931855  | Pool=2 |
| pbp1a_AF446215  | 341  | 539 AMPL3931856  | Pool=1 |
| pbp1a_AF446215  | 528  | 731 AMPL3931857  | Pool=2 |
| pbp1a_AF446215  | 720  | 938 AMPL3931858  | Pool=1 |
| pbp1a_AF446215  | 927  | 1139 AMPL3931859 | Pool=2 |
| pbp1a_AF446215  | 1128 | 1349 AMPL3931860 | Pool=1 |
| pbp1a_AF446215  | 1338 | 1555 AMPL3931861 | Pool=2 |
| pbp1a_AF446215  | 1544 | 1723 AMPL3931862 | Pool=1 |
| pbp2a_AF101780  | 70   | 167 AMPL3930257  | Pool=1 |
| pbp2a_AF101780  | 156  | 377 AMPL3931886  | Pool=2 |
| pbp2a_AF101780  | 366  | 583 AMPL3931887  | Pool=1 |
| pbp2a_AF101780  | 572  | 790 AMPL3931888  | Pool=2 |
| pbp2a_AF101780  | 779  | 965 AMPL3931889  | Pool=1 |
| pbp2a_AF101780  | 954  | 1181 AMPL3931890 | Pool=2 |
| pbp2a_AF101780  | 1170 | 1343 AMPL3931891 | Pool=1 |
| pbp2a_AF101780  | 1332 | 1553 AMPL3931892 | Pool=2 |
| pbp2a_AF101780  | 1542 | 1747 AMPL3931893 | Pool=1 |
| pbp2a_AF101780  | 1736 | 1937 AMPL3931894 | Pool=2 |
| pbp2a_AF101780  | 1926 | 2145 AMPL3931895 | Pool=1 |
| pbp3_AJ243120   | 89   | 218 AMPL3931863  | Pool=2 |

|                |      |                  |        |
|----------------|------|------------------|--------|
| pbp3_AJ243120  | 207  | 403 AMPL3931864  | Pool=1 |
| pbp3_AJ243120  | 392  | 599 AMPL3931865  | Pool=2 |
| pbp3_AJ243120  | 588  | 667 AMPL3931866  | Pool=1 |
| pbp3_AJ243120  | 656  | 874 AMPL3931867  | Pool=2 |
| pbp3_AJ243120  | 863  | 1054 AMPL3931868 | Pool=1 |
| pbp3_AJ243120  | 1043 | 1255 AMPL3931869 | Pool=2 |
| pbp3_AJ243120  | 1244 | 1456 AMPL3931870 | Pool=1 |
| pbp3_AJ243120  | 1445 | 1667 AMPL3931871 | Pool=2 |
| pbp3_AJ243120  | 1656 | 1824 AMPL3931872 | Pool=1 |
| pbp3_AJ243120  | 1813 | 2009 AMPL3931873 | Pool=2 |
| pbp5_AF375986  | 64   | 260 AMPL3931877  | Pool=1 |
| pbp5_AF375986  | 249  | 443 AMPL3931878  | Pool=2 |
| pbp5_AF375986  | 432  | 618 AMPL3931879  | Pool=1 |
| pexA_NG_048035 | 24   | 171 AMPL3931087  | Pool=1 |
| pexA_NG_048035 | 160  | 360 AMPL3931088  | Pool=2 |
| pexA_NG_048035 | 349  | 561 AMPL3931089  | Pool=1 |
| pexA_NG_048035 | 550  | 752 AMPL3931090  | Pool=2 |
| pexA_NG_048035 | 741  | 967 AMPL3931091  | Pool=1 |
| pexA_NG_048035 | 956  | 1183 AMPL3931092 | Pool=2 |
| pexA_NG_048035 | 1172 | 1397 AMPL3931093 | Pool=1 |
| pikR1_AF079138 | 21   | 186 AMPL3931556  | Pool=2 |
| pikR1_AF079138 | 179  | 399 AMPL3931557  | Pool=1 |
| pikR1_AF079138 | 385  | 605 AMPL3931558  | Pool=2 |
| pikR1_AF079138 | 567  | 759 AMPL3931559  | Pool=1 |
| pikR1_AF079138 | 748  | 976 AMPL3931560  | Pool=2 |
| pikR2_AF079138 | 44   | 229 AMPL3931561  | Pool=1 |

|                 |      |                  |        |
|-----------------|------|------------------|--------|
| pikR2_AF079138  | 71   | 308 AMPL3931562  | Pool=2 |
| pikR2_AF079138  | 266  | 452 AMPL3931563  | Pool=1 |
| pikR2_AF079138  | 534  | 768 AMPL3931565  | Pool=2 |
| pikR2_AF079138  | 755  | 905 AMPL3931566  | Pool=1 |
| pncA_KY659393   | 32   | 185 AMPL3931785  | Pool=1 |
| pncA_KY659393   | 154  | 346 AMPL3931786  | Pool=2 |
| pncA_KY659393   | 335  | 538 AMPL3931787  | Pool=1 |
| qacA_NG_061385  | 74   | 255 AMPL3931789  | Pool=2 |
| qacA_NG_061385  | 244  | 448 AMPL3931790  | Pool=1 |
| qacA_NG_061385  | 437  | 639 AMPL3931791  | Pool=2 |
| qacA_NG_061385  | 628  | 818 AMPL3931792  | Pool=1 |
| qacA_NG_061385  | 807  | 935 AMPL3931793  | Pool=2 |
| qacA_NG_061385  | 924  | 1145 AMPL3931794 | Pool=1 |
| qacA_NG_061385  | 1134 | 1345 AMPL3931795 | Pool=2 |
| qacA_NG_061385  | 1334 | 1494 AMPL3931796 | Pool=1 |
| qacE_FJ663011   | 67   | 285 AMPL3931799  | Pool=2 |
| qacH_AY816216   | 25   | 200 AMPL3931800  | Pool=1 |
| qacH_AY816216   | 189  | 273 AMPL3931801  | Pool=2 |
| qac_U81980      | 52   | 138 AMPL3930070  | Pool=1 |
| qac_U81980      | 127  | 283 AMPL3931788  | Pool=2 |
| qepA_1_AB263754 | 20   | 252 AMPL3931094  | Pool=1 |
| qepA_1_AB263754 | 110  | 282 AMPL3931095  | Pool=2 |
| qepA_1_AB263754 | 432  | 653 AMPL3931097  | Pool=1 |
| qepA_1_AB263754 | 642  | 863 AMPL3931098  | Pool=2 |
| qepA_1_AB263754 | 857  | 1013 AMPL3931099 | Pool=1 |
| qepA_1_AB263754 | 997  | 1116 AMPL3931100 | Pool=2 |

|                  |      |                  |        |
|------------------|------|------------------|--------|
| qepA_1_AB263754  | 1130 | 1330 AMPL3931102 | Pool=1 |
| qepA_1_AB263754  | 1319 | 1488 AMPL3931103 | Pool=2 |
| rarD_L02122      | 52   | 282 AMPL3931802  | Pool=1 |
| rarD_L02122      | 271  | 439 AMPL3931803  | Pool=2 |
| rarD_L02122      | 428  | 657 AMPL3931804  | Pool=1 |
| rarD_L02122      | 646  | 840 AMPL3931805  | Pool=2 |
| rmtA_1_AB120321  | 40   | 266 AMPL3931018  | Pool=1 |
| rmtA_1_AB120321  | 229  | 312 AMPL3931019  | Pool=2 |
| rmtA_1_AB120321  | 482  | 686 AMPL3931021  | Pool=1 |
| rmtB2_1_JN968578 | 42   | 251 AMPL3931022  | Pool=1 |
| rmtB2_1_JN968578 | 243  | 452 AMPL3931023  | Pool=2 |
| rmtB2_1_JN968578 | 447  | 598 AMPL3931024  | Pool=1 |
| rmtB2_1_JN968578 | 587  | 686 AMPL3931025  | Pool=2 |
| rmtC_1_AB194779  | 49   | 226 AMPL3931026  | Pool=1 |
| rmtC_1_AB194779  | 215  | 420 AMPL3931027  | Pool=2 |
| rmtC_1_AB194779  | 409  | 611 AMPL3931028  | Pool=1 |
| rmtC_1_AB194779  | 600  | 776 AMPL3931029  | Pool=2 |
| rmtD_1_DQ914960  | 24   | 174 AMPL3931030  | Pool=1 |
| rmtD_1_DQ914960  | 102  | 279 AMPL3931031  | Pool=2 |
| rmtD_1_DQ914960  | 300  | 452 AMPL3931033  | Pool=1 |
| rmtD_1_DQ914960  | 436  | 632 AMPL3931034  | Pool=2 |
| rmtD_1_DQ914960  | 601  | 707 AMPL3931035  | Pool=1 |
| rmtE_1_GU201947  | 30   | 175 AMPL3931036  | Pool=1 |
| rmtE_1_GU201947  | 164  | 363 AMPL3931037  | Pool=2 |
| rmtE_1_GU201947  | 352  | 572 AMPL3931038  | Pool=1 |
| rmtE_1_GU201947  | 564  | 777 AMPL3931039  | Pool=2 |

|                 |      |                  |        |
|-----------------|------|------------------|--------|
| rmtG_1_KJ004567 | 51   | 267 AMPL3931044  | Pool=1 |
| rmtG_1_KJ004567 | 242  | 384 AMPL3931045  | Pool=2 |
| rmtG_1_KJ004567 | 373  | 514 AMPL3931046  | Pool=1 |
| rmtG_1_KJ004567 | 512  | 725 AMPL3931047  | Pool=2 |
| rmtH_1_KC544262 | 40   | 181 AMPL3931048  | Pool=1 |
| rmtH_1_KC544262 | 170  | 316 AMPL3931049  | Pool=2 |
| rmtH_1_KC544262 | 305  | 530 AMPL3931050  | Pool=1 |
| rmtH_1_KC544262 | 519  | 689 AMPL3931051  | Pool=2 |
| rmtf_1_JQ808129 | 63   | 295 AMPL3931040  | Pool=1 |
| rmtf_1_JQ808129 | 239  | 437 AMPL3931041  | Pool=2 |
| rmtf_1_JQ808129 | 426  | 536 AMPL3931042  | Pool=1 |
| rmtf_1_JQ808129 | 514  | 730 AMPL3931043  | Pool=2 |
| sat4_AB699882   | 22   | 123 AMPL3931554  | Pool=1 |
| sat4_AB699882   | 112  | 328 AMPL3931555  | Pool=2 |
| sat4_AB699882   | 317  | 416 AMPL3929630  | Pool=1 |
| sdeB_CP033162   | 32   | 242 AMPL3931806  | Pool=1 |
| sdeB_CP033162   | 200  | 400 AMPL3931807  | Pool=2 |
| sdeB_CP033162   | 353  | 575 AMPL3931808  | Pool=1 |
| sdeB_CP033162   | 564  | 735 AMPL3931809  | Pool=2 |
| sdeB_CP033162   | 628  | 857 AMPL3931810  | Pool=1 |
| sdeB_CP033162   | 857  | 1068 AMPL3931811 | Pool=2 |
| sdeB_CP033162   | 1043 | 1258 AMPL3931812 | Pool=1 |
| sdeB_CP033162   | 1246 | 1399 AMPL3931813 | Pool=2 |
| sdeB_CP033162   | 1311 | 1535 AMPL3931814 | Pool=1 |
| sdeB_CP033162   | 1501 | 1726 AMPL3931815 | Pool=2 |
| sdeB_CP033162   | 1720 | 1946 AMPL3931816 | Pool=1 |

|               |      |                  |        |
|---------------|------|------------------|--------|
| sdeB_CP033162 | 1899 | 2125 AMPL3931817 | Pool=2 |
| sdeB_CP033162 | 2115 | 2256 AMPL3931818 | Pool=1 |
| sdeB_CP033162 | 2245 | 2430 AMPL3931819 | Pool=2 |
| sdeB_CP033162 | 2414 | 2601 AMPL3931820 | Pool=1 |
| sdeB_CP033162 | 2581 | 2737 AMPL3931821 | Pool=2 |
| sdeB_CP033162 | 2704 | 2914 AMPL3931822 | Pool=1 |
| sdeB_CP033162 | 2913 | 3104 AMPL3931823 | Pool=2 |
| spcN_AF170704 | 25   | 169 AMPL3932004  | Pool=1 |
| spcN_AF170704 | 160  | 333 AMPL3932005  | Pool=2 |
| spcN_AF170704 | 629  | 721 AMPL3932006  | Pool=1 |
| spcN_AF170704 | 710  | 941 AMPL3932007  | Pool=2 |
| speA_KY594413 | 64   | 231 AMPL3931883  | Pool=1 |
| speA_KY594413 | 220  | 435 AMPL3931884  | Pool=2 |
| speA_KY594413 | 416  | 615 AMPL3931885  | Pool=1 |
| strA_1_M96392 | 44   | 271 AMPL3931052  | Pool=1 |
| strA_1_M96392 | 256  | 468 AMPL3931053  | Pool=2 |
| strA_1_M96392 | 457  | 563 AMPL3928669  | Pool=1 |
| strA_1_M96392 | 552  | 762 AMPL3931054  | Pool=2 |
| strB_EF493834 | 33   | 220 AMPL3931055  | Pool=1 |
| strB_EF493834 | 209  | 334 AMPL3931056  | Pool=2 |
| strB_EF493834 | 323  | 521 AMPL3931057  | Pool=1 |
| strB_EF493834 | 506  | 719 AMPL3931058  | Pool=2 |
| strB_EF493834 | 705  | 852 AMPL3931059  | Pool=1 |
| str_X92946    | 58   | 212 AMPL3931525  | Pool=1 |
| str_X92946    | 190  | 394 AMPL3931526  | Pool=2 |
| str_X92946    | 428  | 577 AMPL3931528  | Pool=1 |



|                  |      |                  |        |
|------------------|------|------------------|--------|
| str_X92946       | 534  | 713 AMPL3931529  | Pool=2 |
| sul1_EF667294    | 29   | 219 AMPL3931667  | Pool=1 |
| sul1_EF667294    | 197  | 364 AMPL3931668  | Pool=2 |
| sul1_EF667294    | 351  | 571 AMPL3931669  | Pool=1 |
| sul1_EF667294    | 457  | 660 AMPL3931670  | Pool=2 |
| sul1_EF667294    | 646  | 791 AMPL3931671  | Pool=1 |
| sul2_DQ464881    | 28   | 223 AMPL3931672  | Pool=2 |
| sul2_DQ464881    | 204  | 432 AMPL3931673  | Pool=1 |
| sul2_DQ464881    | 398  | 616 AMPL3931674  | Pool=2 |
| sul2_DQ464881    | 507  | 727 AMPL3931675  | Pool=1 |
| sulA_KJ831060    | 29   | 168 AMPL3932023  | Pool=1 |
| sulA_KJ831060    | 157  | 367 AMPL3932024  | Pool=2 |
| sulA_KJ831060    | 356  | 576 AMPL3932025  | Pool=1 |
| sulA_KJ831060    | 565  | 782 AMPL3932026  | Pool=2 |
| sulA_KJ831060    | 771  | 902 AMPL3932027  | Pool=1 |
| tet32_1_EU722333 | 59   | 280 AMPL3930531  | Pool=2 |
| tet32_1_EU722333 | 269  | 482 AMPL3930532  | Pool=1 |
| tet32_1_EU722333 | 467  | 657 AMPL3930533  | Pool=2 |
| tet32_1_EU722333 | 646  | 868 AMPL3930534  | Pool=1 |
| tet32_1_EU722333 | 856  | 1066 AMPL3930535 | Pool=2 |
| tet32_1_EU722333 | 1052 | 1278 AMPL3930536 | Pool=1 |
| tet32_1_EU722333 | 1267 | 1478 AMPL3930537 | Pool=2 |
| tet32_1_EU722333 | 1467 | 1661 AMPL3930538 | Pool=1 |
| tet32_1_EU722333 | 1650 | 1872 AMPL3930539 | Pool=2 |
| tet34_1_AB061440 | 44   | 178 AMPL3930540  | Pool=1 |
| tet34_1_AB061440 | 167  | 395 AMPL3930541  | Pool=2 |

|                  |      |                  |        |
|------------------|------|------------------|--------|
| tet35_1_AF353562 | 25   | 218 AMPL3930542  | Pool=1 |
| tet35_1_AF353562 | 207  | 431 AMPL3930543  | Pool=2 |
| tet35_1_AF353562 | 420  | 618 AMPL3930544  | Pool=1 |
| tet35_1_AF353562 | 607  | 832 AMPL3930545  | Pool=2 |
| tet35_1_AF353562 | 821  | 1040 AMPL3930546 | Pool=1 |
| tet36_1_AJ514254 | 45   | 254 AMPL3930547  | Pool=1 |
| tet36_1_AJ514254 | 243  | 450 AMPL3930548  | Pool=2 |
| tet36_1_AJ514254 | 424  | 601 AMPL3930549  | Pool=1 |
| tet36_1_AJ514254 | 590  | 769 AMPL3930550  | Pool=2 |
| tet36_1_AJ514254 | 758  | 942 AMPL3930551  | Pool=1 |
| tet36_1_AJ514254 | 931  | 1149 AMPL3930552 | Pool=2 |
| tet36_1_AJ514254 | 1138 | 1265 AMPL3930553 | Pool=1 |
| tet36_1_AJ514254 | 1254 | 1454 AMPL3930554 | Pool=2 |
| tet36_1_AJ514254 | 1443 | 1665 AMPL3930555 | Pool=1 |
| tet36_1_AJ514254 | 1654 | 1854 AMPL3930556 | Pool=2 |
| tet37_1_AF540889 | 54   | 273 AMPL3930557  | Pool=1 |
| tetAP_1_AB054980 | 66   | 173 AMPL3927682  | Pool=2 |
| tetAP_1_AB054980 | 162  | 352 AMPL3930558  | Pool=1 |
| tetAP_1_AB054980 | 341  | 541 AMPL3930559  | Pool=2 |
| tetAP_1_AB054980 | 503  | 690 AMPL3930560  | Pool=1 |
| tetAP_1_AB054980 | 720  | 806 AMPL3927698  | Pool=2 |
| tetAP_1_AB054980 | 795  | 988 AMPL3930562  | Pool=1 |
| tetAP_1_AB054980 | 1017 | 1207 AMPL3930564 | Pool=2 |
| tetA_2_X00006    | 39   | 249 AMPL3930577  | Pool=1 |
| tetA_2_X00006    | 169  | 401 AMPL3930578  | Pool=2 |
| tetA_2_X00006    | 383  | 533 AMPL3930579  | Pool=1 |

|                   |      |                  |        |
|-------------------|------|------------------|--------|
| tetA_2_X00006     | 524  | 660 AMPL3930580  | Pool=2 |
| tetA_2_X00006     | 660  | 869 AMPL3930581  | Pool=1 |
| tetA_2_X00006     | 857  | 1084 AMPL3930582 | Pool=2 |
| tetA_2_X00006     | 1073 | 1182 AMPL3927738 | Pool=1 |
| tetBP_3_NC_010937 | 53   | 260 AMPL3930565  | Pool=1 |
| tetBP_3_NC_010937 | 252  | 467 AMPL3930566  | Pool=2 |
| tetBP_3_NC_010937 | 433  | 630 AMPL3930567  | Pool=1 |
| tetBP_3_NC_010937 | 580  | 735 AMPL3930568  | Pool=2 |
| tetBP_3_NC_010937 | 715  | 928 AMPL3930569  | Pool=1 |
| tetBP_3_NC_010937 | 958  | 1049 AMPL3930571 | Pool=2 |
| tetBP_3_NC_010937 | 1025 | 1184 AMPL3930572 | Pool=1 |
| tetBP_3_NC_010937 | 1173 | 1327 AMPL3930573 | Pool=2 |
| tetBP_3_NC_010937 | 1316 | 1471 AMPL3930574 | Pool=1 |
| tetBP_3_NC_010937 | 1460 | 1655 AMPL3930575 | Pool=2 |
| tetBP_3_NC_010937 | 1644 | 1842 AMPL3930576 | Pool=1 |
| tetBP_3_NC_010937 | 1831 | 1927 AMPL3927725 | Pool=2 |
| tetB_3_AP000342   | 27   | 246 AMPL3930583  | Pool=1 |
| tetB_3_AP000342   | 235  | 437 AMPL3930584  | Pool=2 |
| tetB_3_AP000342   | 426  | 554 AMPL3930585  | Pool=1 |
| tetB_3_AP000342   | 543  | 754 AMPL3930586  | Pool=2 |
| tetB_3_AP000342   | 743  | 965 AMPL3930587  | Pool=1 |
| tetB_3_AP000342   | 954  | 1136 AMPL3930588 | Pool=2 |
| tetC_2_NC_003123  | 28   | 149 AMPL3927750  | Pool=1 |
| tetC_2_NC_003123  | 122  | 351 AMPL3930589  | Pool=2 |
| tetC_2_NC_003123  | 254  | 467 AMPL3930590  | Pool=1 |
| tetC_2_NC_003123  | 431  | 656 AMPL3930591  | Pool=2 |

|                  |     |                  |        |
|------------------|-----|------------------|--------|
| tetC_2_NC_003123 | 645 | 785 AMPL3930592  | Pool=1 |
| tetC_2_NC_003123 | 774 | 1001 AMPL3930593 | Pool=2 |
| tetC_2_NC_003123 | 990 | 1127 AMPL3930594 | Pool=1 |
| tetD_1_AF467077  | 70  | 300 AMPL3930597  | Pool=1 |
| tetD_1_AF467077  | 290 | 478 AMPL3930598  | Pool=2 |
| tetD_1_AF467077  | 530 | 678 AMPL3930600  | Pool=1 |
| tetD_1_AF467077  | 647 | 855 AMPL3930601  | Pool=2 |
| tetD_1_AF467077  | 833 | 978 AMPL3930602  | Pool=1 |
| tetD_1_AF467077  | 965 | 1132 AMPL3930603 | Pool=2 |
| tetE_3_L06940    | 32  | 241 AMPL3930604  | Pool=1 |
| tetE_3_L06940    | 230 | 390 AMPL3930605  | Pool=2 |
| tetE_3_L06940    | 379 | 591 AMPL3930606  | Pool=1 |
| tetE_3_L06940    | 580 | 798 AMPL3930607  | Pool=2 |
| tetE_3_L06940    | 787 | 954 AMPL3930608  | Pool=1 |
| tetE_3_L06940    | 943 | 1148 AMPL3930609 | Pool=2 |
| tetG_3_S52437    | 32  | 144 AMPL3930610  | Pool=1 |
| tetG_3_S52437    | 133 | 335 AMPL3930611  | Pool=2 |
| tetG_3_S52437    | 299 | 520 AMPL3930612  | Pool=1 |
| tetG_3_S52437    | 475 | 687 AMPL3930613  | Pool=2 |
| tetG_3_S52437    | 670 | 893 AMPL3930614  | Pool=1 |
| tetG_3_S52437    | 882 | 997 AMPL3927797  | Pool=2 |
| tetG_3_S52437    | 986 | 1126 AMPL3930615 | Pool=1 |
| tetH_1_Y16103    | 49  | 275 AMPL3930616  | Pool=1 |
| tetH_1_Y16103    | 264 | 484 AMPL3930617  | Pool=2 |
| tetH_1_Y16103    | 473 | 690 AMPL3930618  | Pool=1 |
| tetH_1_Y16103    | 679 | 894 AMPL3930619  | Pool=2 |

|                     |      |                  |        |
|---------------------|------|------------------|--------|
| tetH_1_Y16103       | 883  | 977 AMPL3927808  | Pool=1 |
| tetH_1_Y16103       | 966  | 1133 AMPL3930620 | Pool=2 |
| tetJ_1_ACLE01000065 | 47   | 265 AMPL3930621  | Pool=1 |
| tetJ_1_ACLE01000065 | 254  | 447 AMPL3930622  | Pool=2 |
| tetJ_1_ACLE01000065 | 435  | 620 AMPL3930623  | Pool=1 |
| tetJ_1_ACLE01000065 | 606  | 829 AMPL3930624  | Pool=2 |
| tetJ_1_ACLE01000065 | 818  | 968 AMPL3930625  | Pool=1 |
| tetJ_1_ACLE01000065 | 957  | 1129 AMPL3930626 | Pool=2 |
| tetK_4_U38428       | 56   | 173 AMPL3930627  | Pool=1 |
| tetK_4_U38428       | 162  | 355 AMPL3930628  | Pool=2 |
| tetK_4_U38428       | 344  | 549 AMPL3930629  | Pool=1 |
| tetK_4_U38428       | 531  | 719 AMPL3930630  | Pool=2 |
| tetK_4_U38428       | 774  | 887 AMPL3930632  | Pool=1 |
| tetK_4_U38428       | 876  | 1024 AMPL3930633 | Pool=2 |
| tetK_4_U38428       | 942  | 1151 AMPL3930634 | Pool=1 |
| tetK_4_U38428       | 1149 | 1348 AMPL3930635 | Pool=2 |
| tetL_1_HM235948     | 37   | 179 AMPL3930636  | Pool=1 |
| tetL_1_HM235948     | 168  | 304 AMPL3930637  | Pool=2 |
| tetL_1_HM235948     | 293  | 511 AMPL3930638  | Pool=1 |
| tetL_1_HM235948     | 500  | 718 AMPL3930639  | Pool=2 |
| tetL_1_HM235948     | 704  | 906 AMPL3930640  | Pool=1 |
| tetL_1_HM235948     | 895  | 1116 AMPL3930641 | Pool=2 |
| tetL_1_HM235948     | 1105 | 1313 AMPL3930642 | Pool=1 |
| tetM_1_X92947       | 42   | 125 AMPL3927857  | Pool=1 |
| tetM_1_X92947       | 114  | 315 AMPL3930643  | Pool=2 |
| tetM_1_X92947       | 304  | 432 AMPL3930644  | Pool=1 |

|               |      |                  |        |
|---------------|------|------------------|--------|
| tetM_1_X92947 | 421  | 616 AMPL3930645  | Pool=2 |
| tetM_1_X92947 | 605  | 824 AMPL3930646  | Pool=1 |
| tetM_1_X92947 | 813  | 1011 AMPL3930647 | Pool=2 |
| tetM_1_X92947 | 1000 | 1072 AMPL3930648 | Pool=1 |
| tetM_1_X92947 | 1061 | 1280 AMPL3930649 | Pool=2 |
| tetM_1_X92947 | 1269 | 1453 AMPL3930650 | Pool=1 |
| tetM_1_X92947 | 1442 | 1659 AMPL3930651 | Pool=2 |
| tetM_1_X92947 | 1648 | 1865 AMPL3930652 | Pool=1 |
| tetO_1_M18896 | 50   | 250 AMPL3930653  | Pool=1 |
| tetO_1_M18896 | 239  | 436 AMPL3930654  | Pool=2 |
| tetO_1_M18896 | 425  | 607 AMPL3930655  | Pool=1 |
| tetO_1_M18896 | 596  | 816 AMPL3930656  | Pool=2 |
| tetO_1_M18896 | 808  | 1020 AMPL3930657 | Pool=1 |
| tetO_1_M18896 | 1009 | 1206 AMPL3930658 | Pool=2 |
| tetO_1_M18896 | 1195 | 1401 AMPL3930659 | Pool=1 |
| tetO_1_M18896 | 1390 | 1595 AMPL3930660 | Pool=2 |
| tetO_1_M18896 | 1584 | 1660 AMPL3927892 | Pool=1 |
| tetO_1_M18896 | 1649 | 1871 AMPL3930661 | Pool=2 |
| tetQ_3_U73497 | 22   | 154 AMPL3930662  | Pool=1 |
| tetQ_3_U73497 | 143  | 360 AMPL3930663  | Pool=2 |
| tetQ_3_U73497 | 349  | 571 AMPL3930664  | Pool=1 |
| tetQ_3_U73497 | 560  | 773 AMPL3930665  | Pool=2 |
| tetQ_3_U73497 | 762  | 985 AMPL3930666  | Pool=1 |
| tetQ_3_U73497 | 974  | 1044 AMPL3927905 | Pool=2 |
| tetQ_3_U73497 | 1227 | 1441 AMPL3930668 | Pool=1 |
| tetQ_3_U73497 | 1430 | 1579 AMPL3930669 | Pool=2 |

|               |      |                  |        |
|---------------|------|------------------|--------|
| tetQ_3_U73497 | 1568 | 1771 AMPL3930670 | Pool=1 |
| tetQ_3_U73497 | 1760 | 1952 AMPL3930671 | Pool=2 |
| tetR_KF697108 | 31   | 190 AMPL3930672  | Pool=1 |
| tetR_KF697108 | 179  | 396 AMPL3930673  | Pool=2 |
| tetR_KF697108 | 385  | 580 AMPL3930674  | Pool=1 |
| tetS_3_X92946 | 56   | 129 AMPL3930675  | Pool=1 |
| tetS_3_X92946 | 118  | 308 AMPL3930676  | Pool=2 |
| tetS_3_X92946 | 297  | 519 AMPL3930677  | Pool=1 |
| tetS_3_X92946 | 508  | 715 AMPL3930678  | Pool=2 |
| tetS_3_X92946 | 696  | 900 AMPL3930679  | Pool=1 |
| tetS_3_X92946 | 876  | 1078 AMPL3930680 | Pool=2 |
| tetS_3_X92946 | 1067 | 1190 AMPL3930681 | Pool=1 |
| tetS_3_X92946 | 1179 | 1358 AMPL3930682 | Pool=2 |
| tetS_3_X92946 | 1347 | 1574 AMPL3930683 | Pool=1 |
| tetS_3_X92946 | 1563 | 1785 AMPL3930684 | Pool=2 |
| tetS_3_X92946 | 1774 | 1873 AMPL3927940 | Pool=1 |
| tetT_1_L42544 | 46   | 123 AMPL3927941  | Pool=1 |
| tetT_1_L42544 | 112  | 292 AMPL3930685  | Pool=2 |
| tetT_1_L42544 | 281  | 487 AMPL3930686  | Pool=1 |
| tetT_1_L42544 | 415  | 586 AMPL3930687  | Pool=2 |
| tetT_1_L42544 | 721  | 914 AMPL3930689  | Pool=1 |
| tetT_1_L42544 | 903  | 1116 AMPL3930690 | Pool=2 |
| tetT_1_L42544 | 1105 | 1322 AMPL3930691 | Pool=1 |
| tetT_1_L42544 | 1311 | 1480 AMPL3930692 | Pool=2 |
| tetT_1_L42544 | 1469 | 1685 AMPL3930693 | Pool=1 |
| tetT_1_L42544 | 1674 | 1889 AMPL3930694 | Pool=2 |

|                 |      |                  |        |
|-----------------|------|------------------|--------|
| tetU_1_U01917   | 57   | 268 AMPL3930695  | Pool=1 |
| tetV_1_AF030344 | 62   | 279 AMPL3930696  | Pool=1 |
| tetV_1_AF030344 | 272  | 508 AMPL3930697  | Pool=2 |
| tetV_1_AF030344 | 491  | 674 AMPL3930698  | Pool=1 |
| tetV_1_AF030344 | 663  | 830 AMPL3930699  | Pool=2 |
| tetV_1_AF030344 | 819  | 930 AMPL3930700  | Pool=1 |
| tetV_1_AF030344 | 911  | 1100 AMPL3930701 | Pool=2 |
| tetV_1_AF030344 | 1089 | 1223 AMPL3930702 | Pool=1 |
| tetW_1_DQ060146 | 39   | 158 AMPL3927986  | Pool=2 |
| tetW_1_DQ060146 | 147  | 353 AMPL3930703  | Pool=1 |
| tetW_1_DQ060146 | 342  | 555 AMPL3930704  | Pool=2 |
| tetW_1_DQ060146 | 544  | 677 AMPL3930705  | Pool=1 |
| tetW_1_DQ060146 | 669  | 900 AMPL3930706  | Pool=2 |
| tetW_1_DQ060146 | 891  | 1118 AMPL3930707 | Pool=1 |
| tetW_1_DQ060146 | 1111 | 1319 AMPL3930708 | Pool=2 |
| tetW_1_DQ060146 | 1305 | 1504 AMPL3930709 | Pool=1 |
| tetW_1_DQ060146 | 1493 | 1676 AMPL3930710 | Pool=2 |
| tetW_1_DQ060146 | 1665 | 1881 AMPL3930711 | Pool=1 |
| tetX            | 507  | 678 AMPL3931973  | Pool=1 |
| tetX            | 667  | 840 AMPL3931974  | Pool=2 |
| tetX            | 829  | 1044 AMPL3931975 | Pool=1 |
| tetX3_MK134375  | 507  | 696 AMPL3931257  | Pool=2 |
| tetX3_MK134375  | 685  | 894 AMPL3931258  | Pool=1 |
| tetX3_MK134375  | 883  | 1110 AMPL3931259 | Pool=2 |
| tetX4_MK134376  | 118  | 291 AMPL3931249  | Pool=1 |
| tetX4_MK134376  | 280  | 500 AMPL3931250  | Pool=2 |



|                |      |                  |        |
|----------------|------|------------------|--------|
| tetX4_MK134376 | 489  | 680 AMPL3931251  | Pool=1 |
| tnpA_JX570731  | 77   | 220 AMPL3931691  | Pool=2 |
| tnpA_JX570731  | 209  | 349 AMPL3931692  | Pool=1 |
| tnpA_JX570731  | 294  | 489 AMPL3931693  | Pool=2 |
| tnpA_JX570731  | 451  | 613 AMPL3931694  | Pool=1 |
| tnpA_JX570731  | 601  | 761 AMPL3931695  | Pool=2 |
| tnpA_JX570731  | 1053 | 1212 AMPL3931696 | Pool=1 |
| tnpA_JX570731  | 1220 | 1451 AMPL3931697 | Pool=2 |
| tolC_FJ768952  | 46   | 138 AMPL3930136  | Pool=1 |
| tolC_FJ768952  | 127  | 302 AMPL3931824  | Pool=2 |
| tolC_FJ768952  | 291  | 497 AMPL3931825  | Pool=1 |
| tolC_FJ768952  | 486  | 706 AMPL3931826  | Pool=2 |
| tolC_FJ768952  | 692  | 914 AMPL3931827  | Pool=1 |
| tolC_FJ768952  | 903  | 1084 AMPL3931828 | Pool=2 |
| tolC_FJ768952  | 1073 | 1261 AMPL3931829 | Pool=1 |
| tolC_FJ768952  | 1250 | 1449 AMPL3931830 | Pool=2 |
| ttgA_AF031417  | 22   | 232 AMPL3931831  | Pool=1 |
| ttgA_AF031417  | 221  | 382 AMPL3931832  | Pool=2 |
| ttgA_AF031417  | 371  | 585 AMPL3931833  | Pool=1 |
| ttgA_AF031417  | 583  | 735 AMPL3931834  | Pool=2 |
| ttgA_AF031417  | 723  | 946 AMPL3931835  | Pool=1 |
| ttgA_AF031417  | 941  | 1130 AMPL3931836 | Pool=2 |
| ttgB_AF031417  | 57   | 260 AMPL3931837  | Pool=1 |
| ttgB_AF031417  | 249  | 416 AMPL3931838  | Pool=2 |
| ttgB_AF031417  | 405  | 572 AMPL3931839  | Pool=1 |
| ttgB_AF031417  | 560  | 761 AMPL3931840  | Pool=2 |

|                  |      |                  |        |
|------------------|------|------------------|--------|
| ttgB_AF031417    | 750  | 969 AMPL3931841  | Pool=1 |
| ttgB_AF031417    | 950  | 1095 AMPL3931842 | Pool=2 |
| ttgB_AF031417    | 1084 | 1299 AMPL3931843 | Pool=1 |
| ttgB_AF031417    | 1274 | 1484 AMPL3931844 | Pool=2 |
| ttgB_AF031417    | 1467 | 1686 AMPL3931845 | Pool=1 |
| ttgB_AF031417    | 1660 | 1809 AMPL3931846 | Pool=2 |
| ttgB_AF031417    | 1798 | 1903 AMPL3931847 | Pool=1 |
| ttgB_AF031417    | 1892 | 2094 AMPL3931848 | Pool=2 |
| ttgB_AF031417    | 2084 | 2296 AMPL3931849 | Pool=1 |
| ttgB_AF031417    | 2285 | 2491 AMPL3931850 | Pool=2 |
| ttgB_AF031417    | 2478 | 2664 AMPL3931851 | Pool=1 |
| ttgB_AF031417    | 2653 | 2817 AMPL3931852 | Pool=2 |
| ttgB_AF031417    | 2805 | 3018 AMPL3931853 | Pool=1 |
| ttgB_AF031417    | 3006 | 3120 AMPL3930194 | Pool=2 |
| vanA_1_FJ866609  | 59   | 176 AMPL3931264  | Pool=1 |
| vanA_1_FJ866609  | 165  | 385 AMPL3931265  | Pool=2 |
| vanA_1_FJ866609  | 374  | 595 AMPL3931266  | Pool=1 |
| vanA_1_FJ866609  | 584  | 766 AMPL3931267  | Pool=2 |
| vanA_1_FJ866609  | 754  | 973 AMPL3931268  | Pool=1 |
| vanRC_4_EU151753 | 50   | 224 AMPL3931307  | Pool=1 |
| vanRC_4_EU151753 | 213  | 435 AMPL3931308  | Pool=2 |
| vanRC_4_EU151753 | 424  | 641 AMPL3931309  | Pool=1 |
| vanSC_1_AF162694 | 32   | 200 AMPL3931320  | Pool=1 |
| vanSC_1_AF162694 | 189  | 408 AMPL3931321  | Pool=2 |
| vanSC_1_AF162694 | 397  | 586 AMPL3931322  | Pool=1 |
| vanSC_1_AF162694 | 575  | 801 AMPL3931323  | Pool=2 |

|                  |      |                  |        |
|------------------|------|------------------|--------|
| vanSC_1_AF162694 | 790  | 1016 AMPL3931324 | Pool=1 |
| vanSE_AY700375   | 33   | 102 AMPL3929173  | Pool=1 |
| vanSE_AY700375   | 91   | 306 AMPL3931325  | Pool=2 |
| vanSE_AY700375   | 295  | 413 AMPL3931326  | Pool=1 |
| vanSE_AY700375   | 402  | 586 AMPL3931327  | Pool=2 |
| vanSE_AY700375   | 575  | 786 AMPL3931328  | Pool=1 |
| vanTE_FJ872411   | 57   | 273 AMPL3931339  | Pool=2 |
| vanTE_FJ872411   | 148  | 372 AMPL3931340  | Pool=1 |
| vanTE_FJ872411   | 364  | 507 AMPL3931341  | Pool=2 |
| vanTE_FJ872411   | 493  | 593 AMPL3929205  | Pool=1 |
| vanTE_FJ872411   | 582  | 793 AMPL3931342  | Pool=2 |
| vanTE_FJ872411   | 781  | 965 AMPL3931343  | Pool=1 |
| vanTE_FJ872411   | 956  | 1174 AMPL3931344 | Pool=2 |
| vanTE_FJ872411   | 1163 | 1364 AMPL3931345 | Pool=1 |
| vanTE_FJ872411   | 1353 | 1512 AMPL3931346 | Pool=2 |
| vanTE_FJ872411   | 1501 | 1634 AMPL3931347 | Pool=1 |
| vanTE_FJ872411   | 1623 | 1837 AMPL3931348 | Pool=2 |
| vanTE_FJ872411   | 1826 | 2044 AMPL3931349 | Pool=1 |
| vatA_1_L07778    | 30   | 253 AMPL3930960  | Pool=1 |
| vatA_1_L07778    | 242  | 460 AMPL3930961  | Pool=2 |
| vatA_1_L07778    | 449  | 605 AMPL3930962  | Pool=1 |
| vatB_1_U19459    | 27   | 234 AMPL3930963  | Pool=2 |
| vatB_1_U19459    | 223  | 379 AMPL3930964  | Pool=1 |
| vatB_1_U19459    | 368  | 584 AMPL3930965  | Pool=2 |
| vatC_1_AF015628  | 53   | 252 AMPL3930966  | Pool=1 |
| vatC_1_AF015628  | 241  | 378 AMPL3930967  | Pool=2 |

|                 |      |                  |        |
|-----------------|------|------------------|--------|
| vatC_1_AF015628 | 367  | 583 AMPL3930968  | Pool=1 |
| vatE_AF242872   | 24   | 164 AMPL3932038  | Pool=2 |
| vatE_AF242872   | 153  | 376 AMPL3932039  | Pool=1 |
| vatE_AF242872   | 365  | 575 AMPL3932040  | Pool=2 |
| vgaA_1_M90056   | 61   | 233 AMPL3930969  | Pool=1 |
| vgaA_1_M90056   | 222  | 421 AMPL3930970  | Pool=2 |
| vgaA_1_M90056   | 404  | 618 AMPL3930971  | Pool=1 |
| vgaA_1_M90056   | 613  | 807 AMPL3930972  | Pool=2 |
| vgaA_1_M90056   | 790  | 987 AMPL3930973  | Pool=1 |
| vgaA_1_M90056   | 979  | 1200 AMPL3930974 | Pool=2 |
| vgaA_1_M90056   | 1189 | 1291 AMPL3928513 | Pool=1 |
| vgaA_1_M90056   | 1280 | 1499 AMPL3930975 | Pool=2 |
| vgaA_V_AF186237 | 69   | 286 AMPL3931422  | Pool=1 |
| vgaA_V_AF186237 | 275  | 492 AMPL3931423  | Pool=2 |
| vgaA_V_AF186237 | 481  | 666 AMPL3931424  | Pool=1 |
| vgaA_V_AF186237 | 655  | 878 AMPL3931425  | Pool=2 |
| vgaA_V_AF186237 | 867  | 1089 AMPL3931426 | Pool=1 |
| vgaA_V_AF186237 | 1078 | 1298 AMPL3931427 | Pool=2 |
| vgaA_V_AF186237 | 1287 | 1504 AMPL3931428 | Pool=1 |
| vgaB_U82085     | 30   | 144 AMPL3931429  | Pool=1 |
| vgaB_U82085     | 133  | 359 AMPL3931430  | Pool=2 |
| vgaB_U82085     | 353  | 552 AMPL3931431  | Pool=1 |
| vgaB_U82085     | 594  | 742 AMPL3931433  | Pool=2 |
| vgaB_U82085     | 731  | 947 AMPL3931434  | Pool=1 |
| vgaB_U82085     | 936  | 1112 AMPL3931435 | Pool=2 |
| vgaB_U82085     | 1090 | 1195 AMPL3929397 | Pool=1 |

|                 |      |                  |        |
|-----------------|------|------------------|--------|
| vgaB_U82085     | 1184 | 1378 AMPL3931436 | Pool=2 |
| vgaB_U82085     | 1367 | 1557 AMPL3931437 | Pool=1 |
| vgaC_NG_048559  | 32   | 217 AMPL3931439  | Pool=1 |
| vgaC_NG_048559  | 206  | 419 AMPL3931440  | Pool=2 |
| vgaC_NG_048559  | 408  | 631 AMPL3931441  | Pool=1 |
| vgaC_NG_048559  | 620  | 794 AMPL3931442  | Pool=2 |
| vgaC_NG_048559  | 783  | 953 AMPL3931443  | Pool=1 |
| vgaC_NG_048559  | 942  | 1115 AMPL3931444 | Pool=2 |
| vgaC_NG_048559  | 1104 | 1309 AMPL3931445 | Pool=1 |
| vgaC_NG_048559  | 1298 | 1501 AMPL3931446 | Pool=2 |
| vgaE_FR772051   | 92   | 306 AMPL3931447  | Pool=1 |
| vgaE_FR772051   | 295  | 509 AMPL3931448  | Pool=2 |
| vgaE_FR772051   | 498  | 694 AMPL3931449  | Pool=1 |
| vgaE_FR772051   | 683  | 889 AMPL3931450  | Pool=2 |
| vgaE_FR772051   | 877  | 1094 AMPL3931451 | Pool=1 |
| vgaE_FR772051   | 1083 | 1304 AMPL3931452 | Pool=2 |
| vgaE_FR772051   | 1293 | 1504 AMPL3931453 | Pool=1 |
| vgbB_1_AF015628 | 42   | 200 AMPL3930976  | Pool=2 |
| vgbB_1_AF015628 | 189  | 402 AMPL3930977  | Pool=1 |
| vgbB_1_AF015628 | 391  | 613 AMPL3930978  | Pool=2 |
| vgbB_1_AF015628 | 602  | 818 AMPL3930979  | Pool=1 |

---
